# Supplementary material for: Pd(ii)-catalyzed formal [4+1] cycloaddition reactions of diazoacetates and aryl propargyl alcohols to form 2,5-dihydrofurans
Source: Royal Society of Chemistry journal article supplement (doi:10.1039/c5cc05000f), 2015-01-01
Supplement: c5cc05000f1.pdf [file c5cc05000f1.pdf]

# **Pd(II)-Catalyzed Formal [4+1] Cycloadditions of Diazoacetates and Aryl Propargyl Alcohols to Form 2, 5-Dihydrofurans**

Taoda Shi<sup>#a</sup>, Xin Guo<sup>#a</sup>, Wenhao Hu<sup>\*a,b</sup>

<sup>a</sup>*Institute of Drug Discovery and Development, East China Normal University, Shanghai Engineering Research Center for Molecular Therapeutics and New Drug Development, Shanghai, 200062 (China)*

E-mail: [whu@chem.ecnu.edu.cn](mailto:whu@chem.ecnu.edu.cn)

<sup>b</sup>*Department of Chemistry, East China Normal University, Shanghai 200062, P.R. (China.) Fax: (+86) 21-62233176*

<sup>#</sup>*The authors contributed equally.*

## **Supporting Information**

|                                                                                                                                                        |              |
|--------------------------------------------------------------------------------------------------------------------------------------------------------|--------------|
| <b>General Information</b>                                                                                                                             | <b>2</b>     |
| <b>General Procedure for the synthesis of aryl propargyl alcohols</b>                                                                                  | <b>2</b>     |
| <b>General Procedure for the synthesis of diazoacetates</b>                                                                                            | <b>2</b>     |
| <b>Procedure for Cu(OTf)<sub>2</sub>-catalyzed reaction of diazoesters and alkynes</b>                                                                 | <b>2-3</b>   |
| <b>Procedure for Complex of [PdCl(<math>\eta^3</math>-C<sub>3</sub>H<sub>5</sub>)]<sub>2</sub> and <i>t</i>-Bu-Box-catalyzed reaction of 1a and 2a</b> | <b>3-4</b>   |
| <b>Procedure for AgSbF<sub>6</sub>-activated [Ir(COD)Cl]<sub>2</sub> catalyzed cyclopropenation of 1a and 2a</b>                                       | <b>4</b>     |
| <b>Synthesis of 2, 5-Dihydrofurans</b>                                                                                                                 | <b>4-9</b>   |
| <b>Procedure for hydrolysis of 2, 5-Dihydrofuran 3a</b>                                                                                                | <b>9-10</b>  |
| <b>Procedure for PCC oxidation of 2, 5-Dihydrofuran 3a</b>                                                                                             | <b>10</b>    |
| <b>Procedure for reduction of 2, 5-Dihydrofuran 3a</b>                                                                                                 | <b>10-11</b> |
| <b>References</b>                                                                                                                                      | <b>11</b>    |
| <b>NMR Spectra</b>                                                                                                                                     | <b>12-36</b> |
| <b>X-ray Crystal Structure Data</b>                                                                                                                    | <b>37</b>    |

**General Information** All reactions were carried out under nitrogen atmosphere with magnetic stirring. All  $^1\text{H}$  NMR, and  $^{13}\text{C}$  NMR spectra were recorded using a Bruker-400 MHz spectrometer in  $\text{CDCl}_3$  unless otherwise noted. Tetramethylsilane (TMS) served as an internal standard ( $\delta = 0$ ) for  $^1\text{H}$  NMR. Chemical shifts are reported in parts per million as follows: chemical shift, multiplicity (s = singlet, d = doublet, t = triplet, q = quartet, m = multiplet, br = broad). HRMS (ESI) Mass spectra were recorded on Ion Spec FT-ICR mass spectrometer.

#### **General Procedure for the synthesis of aryl propargyl alcohols**

All the aryl propargyl alcohols are prepared as the reported procedures.<sup>1</sup> To a 50 mL three-necked flask equipped with a condenser and a nitrogen balloon, was added aryl bromide (5.0 mmol, 1.0 eq),  $\text{Pd}(\text{PPh}_3)_2\text{Cl}_2$  (0.05 mmol, 0.01 eq),  $\text{CuI}$  (0.5 mmol, 0.1 eq.), 25 mL  $\text{Et}_3\text{N}$  and propargyl alcohol (6.0 mmol, 1.2 eq.). Then the mixture was heated up to 80 °C overnight. After the reaction finished, the mixture was poured into cold ammonia solution, stirred for 5 mins, and extracted with ethyl acetate for 3 times (15 mL/per run). The combined organic phase was washed with  $\text{NH}_4\text{Cl}$  and brine, dried with anhydrous  $\text{MgSO}_4$ , filtered and evaporated. All the alcohols were purified on Silicon gel column chromatography with petrol ether and ethyl acetate as elution.

#### **General Procedure for the synthesis of diazoacetates**

All the diazoacetates were prepared as reported procedures.<sup>2</sup> Methyl arylacetates (10 mmol, 1.0 eq) and *p*-ABSA (11 mmol, 1.1 eq.) was dissolved in a 100 mL flask with 40 mL  $\text{CH}_3\text{CN}$ . After the flask was fixed in ice bath for 10 min, 20 mL solution of DBU (1.1 mmol, 1.1 eq.) in  $\text{CH}_3\text{CN}$  was added drop wise. The starting material disappeared in 2 hours, monitored by TLC. Then the reaction mixture was dumped down to saturated aqueous  $\text{NH}_4\text{Cl}$  at 0 °C and stirred for 10 min. The resulting mixture was extracted with diethyl ether for 3 times (20 mL for each run). The combined organic phase was washed with 60 mL brine, dried with anhydrous  $\text{Na}_2\text{SO}_4$ , filtered and evaporated. The crude product, mixed with 5 g silica gel, was loaded on the chromatography column, using pure petrol ether as the elution, and the pure products were obtained.

#### **Procedure for $\text{Cu}(\text{OTf})_2$ -catalyzed reaction of 1a and 2a**

A 2-necked flask was dried with heat gun, and cooled down in the Nitrogen

atmosphere. To the flask, 200 mg 4 Å MS, Cu(OTf)<sub>2</sub> (0.04mmol, 0.1 eq.), **2a** (0.4mmol, 1.0 eq.) and 8 mL anhydrous dichloromethane was added, and then **1a** (0.6mmol, 1.5 eq.) dissolved in 4 mL anhydrous dichloromethane was added via a syringe pump over 1 hr at rt. To the crude product, 0.3g Silicon gel and 1 mL anhydrous dichloromethane was added, and then the solvent was vaporized via vacuum rotator. The pure products were obtained by column chromatography with petrol ether and ethyl acetate (v/v = 50 : 1-20 : 1) as eluent.

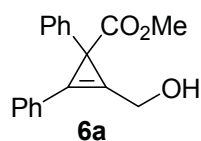

Column chromatography afforded the desired product **6a** in 14% yield as colorless liquid (solidified when stored in freeze for several days): <sup>1</sup>HNMR(400 MHz, CDCl<sub>3</sub>): δ7.36 (dd, *J*<sub>1</sub> = 8.4 Hz, *J*<sub>2</sub> = 1.6 Hz, 1H), 7.29 – 7.23 (m, 5H), 7.22–7.18 (m, 2H), 3.72 (s, 3H). <sup>13</sup>CNMR (100 MHz, CDCl<sub>3</sub>): 175.2, 140.3, 129.8, 129.5, 129.0, 128.2, 128.1, 126.6, 125.7, 113.5, 110.9, 56.7, 52.4, 36.7. HRMS: calcd for C<sub>18</sub>H<sub>16</sub>O<sub>3</sub>Na [M+Na]<sup>+</sup>, 303.0997, found 303.1002.

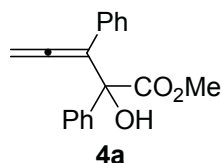

Column chromatography afforded the desired product **4a** in 28% yield as colorless liquid: <sup>1</sup>HNMR(400 MHz, CDCl<sub>3</sub>): δ7.34 (dd, *J*<sub>1</sub> = 16 Hz, 2H), 7.29 (d, *J*<sub>1</sub> = 7.6 Hz, 2H), 7.28–7.13 (m, 6H), 5.12 (s, 2H), 4.23 (s, 1H), 3.70 (s, 3H). <sup>13</sup>CNMR (100 MHz, CDCl<sub>3</sub>): 209.18, 174.42, 139.5, 133.3, 131.8, 128.1, 128.0, 127.9, 127.2, 126.9, 108.8, 81.3, 79.7, 53.3. HRMS: calcd for C<sub>18</sub>H<sub>16</sub>O<sub>3</sub>Na [M+Na]<sup>+</sup>, 303.0997, found 303.0983.

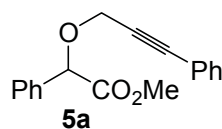

Column chromatography afforded the desired product **5a** in 5% yield as colorless liquid: <sup>1</sup>HNMR(400 MHz, CDCl<sub>3</sub>): δ7.34 (dd, *J*<sub>1</sub> = 16 Hz, 2H), 7.29 (d, *J*<sub>1</sub> = 7.6 Hz, 2H), 7.28–7.13 (m, 6H), 5.12 (s, 2H), 4.23 (s, 1H), 3.70 (s, 3H). <sup>13</sup>CNMR (100 MHz, CDCl<sub>3</sub>): 209.18, 174.42, 139.5, 133.3, 131.8, 128.1, 128.0, 127.9, 127.2, 126.9, 108.8, 81.3, 79.7, 53.3. HRMS: calcd for C<sub>18</sub>H<sub>16</sub>O<sub>3</sub>Na [M+Na]<sup>+</sup>, 303.0997, found 303.0998.

### Procedure for Complex of [PdCl(η<sup>3</sup>-C<sub>3</sub>H<sub>5</sub>)]<sub>2</sub> and *t*-Bu-Box-catalyzed reaction of **1a** and **2a**.

A 2-necked flask was dried with heat gun, and cooled down in the Nitrogen atmosphere. To the flask, 200 mg 4 Å MS, [PdCl(η<sup>3</sup>-C<sub>3</sub>H<sub>5</sub>)]<sub>2</sub> (0.008mmol, 0.02 eq.), *t*-Bu-Box (0.016mmol, 0.04eq.) and 1 mL anhydrous dichloromethane was added and the reaction mixture was stirred at room temperature for 2 hours before

phenyl propargyl alcohol **2a** (0.4mmol, 1.0 eq.) and 8 mL anhydrous dichloromethane was added. Methyl phenyldiazoacetate **1a** (0.6mmol, 1.5 eq.) dissolved in 4 mL anhydrous dichloromethane was added via a syringe pump over 1 hour at rt. To the crude product, 0.3 g Silicon gel and 1 mL anhydrous dichloromethane was added, and the solvent was vaporized via a vacuum rotator. The pure products were obtained by column chromatography with petrol ether and ethyl acetate (v/v = 20 : 1) as eluent.

**Procedure for AgSbF<sub>6</sub>-activated [Ir(COD)Cl]<sub>2</sub> catalyzed cyclopropenation of **1a** and **2a**:**

A 2-necked flask was dried with heat gun, and cooled down in the Nitrogen atmosphere. To the flask, 200 mg 4 Å MS, [Ir(COD)Cl]<sub>2</sub>(0.01mmol, 0.05 equiv), AgSbF<sub>6</sub>(0.02 mmol, 0.1 equiv), *R*-BINAP (0.01 mmol, 0.05equiv) and 1 mL anhydrous dichloromethane was added, and stirred at room temperature for 2 hours. **2a** (0.2 mmol, 1.0 eq.) and 8 mL anhydrous dichloromethane was added, and then **1a** (0.3mmol, 1.5 eq.) dissolved in 4 mL anhydrous dichloromethane was added via a syringe pump over 1 hour at rt. Then 4 Å MS was removed via flash column chromatography. To the crude product, 0.2 g Silicon gel and 1 mL anhydrous dichloromethane was added, and then the solvent was vaporized via vacuum rotator. The pure products were obtained by column chromatography with petrol ether and ethyl acetate (v/v = 3:1) as elution.

**General Procedure for Pd(II)-catalyzed auto-tandem reaction of diazoesters and arylpropargyl alcohols**

A 2-necked flask was dried with heat gun, and cooled down in the Nitrogen atmosphere. To the flask, 200 mg 4 Å MS, [PdCl(η<sup>3</sup>-C<sub>3</sub>H<sub>5</sub>)]<sub>2</sub> (0.004mmol, 0.02equiv), aryl propargyl alcohol **2**(0.2 mmol, 1.0 eq.) and 8 mL anhydrous dichloromethane was added and stirred. Then diazoacetate **1**(0.3mmol, 1.5 eq.) dissolved in 4 mL anhydrous dichloromethane was added via a syringe pump over 1 hr at rt. To the crude product, 0.2 g Silicon gel and 1 mL anhydrous dichloromethane was added, and the solvent was vaporized via vacuum rotator. The pure products were obtained by column chromatography with petrol ether and ethyl acetate (v/v = 20:1) as elution.

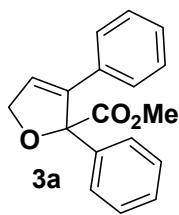

Column chromatography afforded the desired product **3a** in 70% yield as colorless liquid:  $^1\text{H NMR}$ (400 MHz,  $\text{CDCl}_3$ ):  $\delta$ 7.35 – 7.20 (m, 10H), 6.47 (t,  $J$  = 2 Hz, 1H), 4.99 (dd,  $J_1$  = 5.2 Hz,  $J_2$  = 2 Hz, 1H), 4.93 (dd,  $J_1$  = 5.2 Hz,  $J_2$  = 2 Hz, 1H), 3.78 (s, 3H).  $^{13}\text{C NMR}$ (100 MHz,  $\text{CDCl}_3$ ): 172.0, 141.2, 139.4, 132.6, 128.3, 128.2, 128.0, 127.9, 127.4, 126.8, 94.8, 74.8, 52.5. HRMS: calcd for  $\text{C}_{15}\text{H}_{13}\text{N}_3\text{O}_4\text{Na}$   $[\text{M}+\text{Na}]^+$ , 322.0804, found 322.0813.

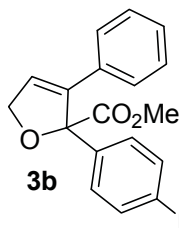

Column chromatography afforded the desired product **3b** in 60% yield as colorless liquid:  $^1\text{H NMR}$ (400 MHz,  $\text{CDCl}_3$ ):  $\delta$ 7.44 (d,  $J$  = 8.8 Hz, 2H), 7.26 – 7.24 (m, 7H), 6.47 (t,  $J$  = 2 Hz, 1H), 4.96 (dd,  $J_1$  = 5.2 Hz,  $J_2$  = 2 Hz, 1H), 4.92 (dd,  $J_1$  = 5.2 Hz,  $J_2$  = 2 Hz, 1H), 3.78 (s, 3H).  $^{13}\text{C NMR}$  (100 MHz,  $\text{CDCl}_3$ ): 171.7, 141.0, 138.4, 132.3, 131.3, 129.2, 128.2, 128.1, 127.8, 127.1, 122.5, 94.1, 75.0, 52.7. HRMS: calcd for  $\text{C}_{15}\text{H}_{13}\text{N}_3\text{O}_4\text{Na}$   $[\text{M}+\text{Na}]^+$ , 322.0804, found 322.0813.

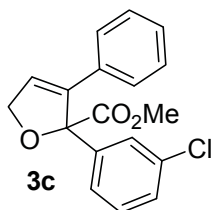

Column chromatography afforded the desired product **3c** in 54% yield as colorless liquid:  $^1\text{H NMR}$ (400 MHz,  $\text{CDCl}_3$ ):  $\delta$ 7.39 (s, 1H), 7.29 – 7.22 (m, 8H), 6.45 (t,  $J$  = 2 Hz, 1H), 4.99 (dd,  $J_1$  = 13.6 Hz,  $J_2$  = 1.6 Hz, 1H), 4.93 (dd,  $J_1$  = 13.6 Hz,  $J_2$  = 1.6 Hz, 1H), 3.78 (s, 3H).  $^{13}\text{C NMR}$  (100 MHz,  $\text{CDCl}_3$ ): 171.5, 141.3, 141.0, 134.2, 132.3, 129.3, 128.4, 128.1, 128.0, 127.9, 127.6, 127.1, 125.6, 94.1, 75.0, 52.7. HRMS: calcd for  $\text{C}_{18}\text{H}_{15}\text{ClO}_3\text{Na}$   $[\text{M}+\text{Na}]^+$ , 337.0607, found 337.0616.

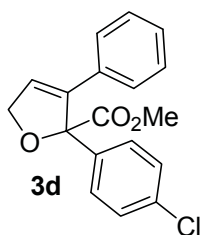

Column chromatography afforded the desired product **3d** in 69% yield as colorless liquid:  $^1\text{H NMR}$ (400 MHz,  $\text{CDCl}_3$ ):  $\delta$ 7.30 – 7.21 (m, 9H), 6.48 (t,  $J$  = 2 Hz, 1H), 4.99 (dd,  $J_1$  = 12 Hz,  $J_2$  = 4 Hz, 1H), 4.93 (dd,  $J_1$  = 12 Hz,  $J_2$  = 4 Hz, 1H), 3.78 (s, 3H).  $^{13}\text{C NMR}$  (100 MHz,  $\text{CDCl}_3$ ): 171.8, 140.9, 137.8, 131.3, 128.9, 128.8, 128.1, 127.8, 127.0, 91.1, 75.0, 52.7. HRMS: calcd for  $\text{C}_{18}\text{H}_{15}\text{ClO}_3\text{Na}$   $[\text{M}+\text{Na}]^+$ , 337.0607, found 337.0619.

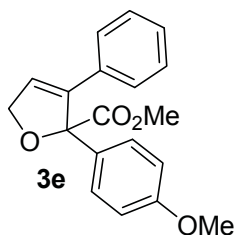

Column chromatography afforded the desired product **3e** in 72% yield as colorless liquid:  $^1\text{H NMR}$ (400 MHz,  $\text{CDCl}_3$ ):  $\delta$ 7.20 – 7.14 (m, 6H), 6.85-6.38 (m, 3H), 6.38 (t,  $J$  = 2 Hz, 1H), 4.91 (dd,  $J_1$  = 14 Hz,  $J_2$  = 2 Hz, 1H), 4.86 (dd,  $J_1$  = 14 Hz,  $J_2$  = 2 Hz, 1H), 3.70 (s, 3H), 3.66 (s, 3H).  $^{13}\text{C NMR}$  (100 MHz,  $\text{CDCl}_3$ ): 171.9, 159.4, 141.3, 140.8, 132.7, 128.0, 127.9, 126.9, 119.7, 55.9, 52.7.

113.8, 113.2, 94.7, 74.8, 55.2, 52.6. HRMS: calcd for C<sub>19</sub>H<sub>18</sub>O<sub>4</sub>Na [M+Na]<sup>+</sup>, 333.1103, found 333.1093

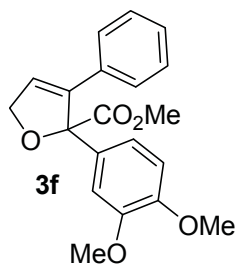

Column chromatography afforded the desired product **3f** in 74% yield as colorless liquid: <sup>1</sup>HNMR(400 MHz, CDCl<sub>3</sub>): δ 7.24 – 6.79 (m, 8H), 6.46 (t, *J* = 2 Hz, 1H), 4.98 (dd, *J*<sub>1</sub> = 14 Hz, *J*<sub>2</sub> = 2 Hz, 1H), 4.92 (dd, *J*<sub>1</sub> = 14 Hz, *J*<sub>2</sub> = 2 Hz, 1H), 3.86 (s, 3H), 3.78 (s, 3H), 3.74 (s, 3H). <sup>13</sup>CNMR (100 MHz, CDCl<sub>3</sub>): 172.2, 149.0, 148.6, 141.3, 132.8, 131.8, 128.0, 127.9, 127.8, 126.8, 119.9, 110.9, 110.6, 94.5, 74.6, 55.8, 55.7, 52.5. HRMS: calcd for C<sub>20</sub>H<sub>20</sub>O<sub>5</sub>Na [M+Na]<sup>+</sup>, 363.1208, found 363.1217.

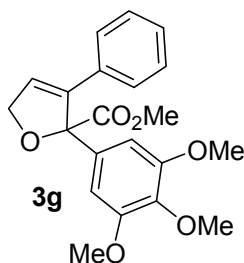

Column chromatography afforded the desired product **3g** in 78% yield as colorless liquid: <sup>1</sup>HNMR(400 MHz, CDCl<sub>3</sub>): δ 7.28 – 7.25 (m, 5H), 6.57 (s, 2H), 6.41 (t, *J* = 1.6 Hz, 1H), 5.00 (dd, *J*<sub>1</sub> = 13.8 Hz, *J*<sub>2</sub> = 1.6 Hz, 1H), 4.92 (dd, *J*<sub>1</sub> = 13.8 Hz, *J*<sub>2</sub> = 1.6 Hz, 1H), 3.83 (s, 3H), 3.79 (s, 3H), 3.70 (s, 6H). <sup>13</sup>CNMR (100 MHz, CDCl<sub>3</sub>): 172.0, 152.8, 141.4, 137.9, 134.5, 132.9, 128.2, 128.0, 127.9, 127.1, 104.7, 94.5, 74.9, 60.8, 56.0, 52.6. HRMS: calcd for C<sub>21</sub>H<sub>22</sub>O<sub>6</sub>Na [M+Na]<sup>+</sup>, 393.1314, found 393.1328.

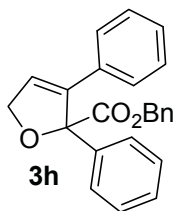

Column chromatography afforded the desired product **3h** in 59% yield as colorless liquid: <sup>1</sup>HNMR(400 MHz, CDCl<sub>3</sub>): δ 7.41 – 7.18 (m, 15H), 6.53 (t, *J* = 1.6 Hz, 1H), 5.26 (s, 2H), 5.00 (dd, *J*<sub>1</sub> = 14 Hz, *J*<sub>2</sub> = 1.6 Hz, 1H), 4.92 (dd, *J*<sub>1</sub> = 14 Hz, *J*<sub>2</sub> = 1.6 Hz, 1H). <sup>13</sup>CNMR (100 MHz, CDCl<sub>3</sub>): 171.3, 141.0, 139.3, 135.5, 132.7, 128.4, 128.3, 128.2, 128.1, 128.0, 127.9, 127.8, 127.5, 127.1, 94.8, 74.9, 67.1. HRMS: calcd for C<sub>24</sub>H<sub>20</sub>O<sub>3</sub>Na [M+Na]<sup>+</sup>, 379.1310, found 379.1312.

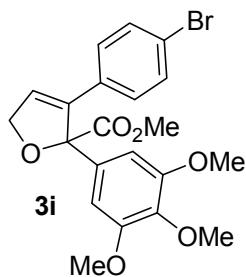

Column chromatography afforded the desired product **3i** in 58% yield as colorless liquid: <sup>1</sup>HNMR(400 MHz, CDCl<sub>3</sub>): δ 7.37 (d, *J* = 6.8 Hz, 2H), 7.14 (d, *J* = 6.8 Hz, 2H), 6.54 (s, 2H), 6.44 (t, *J* = 2 Hz, 1H), 4.97 (dd, *J*<sub>1</sub> = 14.2 Hz, *J*<sub>2</sub> = 1.6 Hz, 1H), 4.92 (dd, *J*<sub>1</sub> = 14.2 Hz, *J*<sub>2</sub> = 1.6 Hz, 1H), 3.84 (s, 3H), 3.78 (s, 3H), 3.73 (s, 6H). <sup>13</sup>CNMR (100 MHz, CDCl<sub>3</sub>): 171.8, 153.0, 140.4, 138.2, 134.2, 131.7, 129.8, 127.6, 122.2, 104.6, 94.6, 74.7, 60.8, 56.1, 52.7. HRMS: calcd for C<sub>21</sub>H<sub>21</sub>BrO<sub>6</sub>Na [M+Na]<sup>+</sup>, 471.0419, found 471.0424.

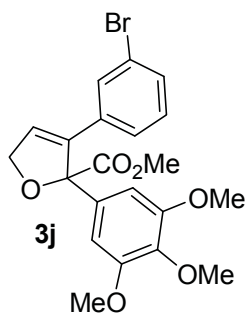

Column chromatography afforded the desired product **3j** in 54% yield as colorless liquid:  $^1\text{H NMR}$  (400 MHz,  $\text{CDCl}_3$ ):  $\delta$  7.38 (d,  $J = 1.6$  Hz, 1H), 7.37 (s, 1H), 7.15–7.07 (m, 2H), 7.07 (s, 1H), 6.39 (t,  $J = 2$  Hz, 1H), 4.98 (dd,  $J_1 = 14.2$  Hz,  $J_2 = 1.6$  Hz, 1H), 4.94 (dd,  $J_1 = 14.2$  Hz,  $J_2 = 1.6$  Hz, 1H), 3.83 (s, 3H), 3.79 (s, 3H), 3.73 (s, 6H).  $^{13}\text{C NMR}$  (100 MHz,  $\text{CDCl}_3$ ): 171.7, 153.0, 140.5, 138.2, 134.2, 131.2, 129.5, 128.2, 127.0, 122.2, 104.5, 94.5, 74.7, 60.8, 56.1, 52.7. HRMS: calcd for  $\text{C}_{21}\text{H}_{21}\text{BrO}_6\text{Na}$   $[\text{M}+\text{Na}]^+$ , 471.0419, found 471.0419.

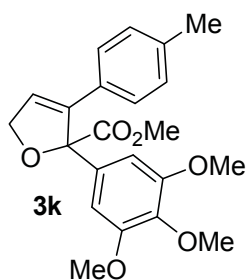

Column chromatography afforded the desired product **3k** in 62% yield as colorless liquid:  $^1\text{H NMR}$  (400 MHz,  $\text{CDCl}_3$ ):  $\delta$  7.18 (d,  $J = 8$  Hz, 2H), 7.05 (d,  $J = 8$  Hz, 2H), 6.58 (s, 2H), 6.39 (t,  $J = 1.6$  Hz, 1H), 4.98 (dd,  $J_1 = 13.6$  Hz,  $J_2 = 1.6$  Hz, 1H), 4.94 (dd,  $J_1 = 13.6$  Hz,  $J_2 = 1.6$  Hz, 1H), 3.83 (s, 3H), 3.78 (s, 3H), 3.72 (s, 6H), 2.31 (s, 3H).  $^{13}\text{C NMR}$  (100 MHz,  $\text{CDCl}_3$ ): 172.0, 152.8, 141.2, 137.9, 134.6, 129.9, 128.8, 128.7, 128.0, 126.2, 104.8, 94.5, 74.8, 60.8, 56.0, 52.6, 21.1. HRMS: calcd for  $\text{C}_{22}\text{H}_{24}\text{O}_6\text{Na}$   $[\text{M}+\text{Na}]^+$ , 407.1471, found 407.1487.

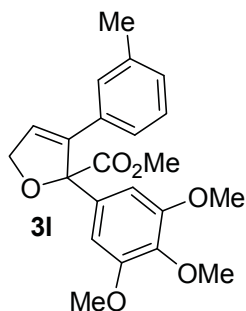

Column chromatography afforded the desired product **3l** in 63% yield as colorless liquid:  $^1\text{H NMR}$  (400 MHz,  $\text{CDCl}_3$ ):  $\delta$  7.13–7.02 (m, 4H), 6.58 (s, 2H), 6.36 (t,  $J = 1.6$  Hz, 1H), 4.99 (dd,  $J_1 = 13.8$  Hz,  $J_2 = 1.6$  Hz, 1H), 4.94 (dd,  $J_1 = 13.8$  Hz,  $J_2 = 1.6$  Hz, 1H), 3.87 (s, 3H), 3.83 (s, 3H), 3.71 (s, 6H), 2.28 (s, 3H).  $^{13}\text{C NMR}$  (100 MHz,  $\text{CDCl}_3$ ): 172.0, 152.8, 141.7, 137.9, 137.5, 134.6, 134.0, 133.0, 128.8, 128.7, 127.9, 126.8, 125.3, 104.7, 104.1, 94.5, 74.8, 60.8, 56.2, 56.0, 52.6, 21.4. HRMS: calcd for  $\text{C}_{22}\text{H}_{24}\text{O}_6\text{Na}$   $[\text{M}+\text{Na}]^+$ , 407.1471, found 407.1478.

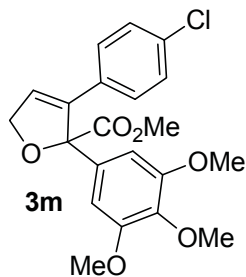

Column chromatography afforded the desired product **3m** in 58% yield as colorless liquid:  $^1\text{H NMR}$  (400 MHz,  $\text{CDCl}_3$ ):  $\delta$  7.21 (s, 4H), 6.54 (s, 2H), 6.43 (t,  $J = 1.6$  Hz, 1H), 4.97 (dd,  $J_1 = 14.0$  Hz,  $J_2 = 1.6$  Hz, 1H), 4.93 (dd,  $J_1 = 14.0$  Hz,  $J_2 = 1.6$  Hz, 1H), 3.83 (s, 3H), 3.78 (s, 3H), 3.73 (s, 6H).  $^{13}\text{C NMR}$  (100 MHz,  $\text{CDCl}_3$ ): 171.8, 153.0, 140.3, 138.2, 134.2, 134.0, 131.3, 129.5, 128.2, 127.6, 104.6, 94.6, 74.7, 60.8, 56.1, 52.7. HRMS: calcd for  $\text{C}_{21}\text{H}_{21}\text{ClO}_6\text{Na}$   $[\text{M}+\text{Na}]^+$ , 427.0924, found 427.0922.

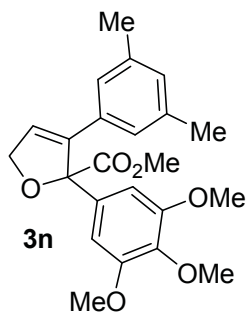

Column chromatography afforded the desired product **3n** in 51% yield as colorless liquid:  $^1\text{H NMR}$  (400 MHz,  $\text{CDCl}_3$ ):  $\delta$  6.89 (s, 1H), 6.85 (s, 2H), 6.59 (s, 2H), 6.31 (t,  $J = 1.6$  Hz, 1H), 4.98 (dd,  $J_1 = 13.7$  Hz,  $J_2 = 1.6$  Hz, 1H), 4.91 (dd,  $J_1 = 13.7$  Hz,  $J_2 = 1.6$  Hz, 1H), 3.82 (s, 3H), 3.79 (s, 3H), 3.71 (s, 3H), 2.23 (s, 6H).  $^{13}\text{C NMR}$  (100 MHz,  $\text{CDCl}_3$ ): 172.0, 152.6, 141.8, 137.8, 137.3, 134.7, 133.0, 129.6, 126.6, 126.0, 104.6, 94.4, 74.8, 60.7, 55.9, 52.6, 21.2. HRMS: calcd for  $\text{C}_{23}\text{H}_{26}\text{O}_6\text{Na}$   $[\text{M}+\text{Na}]^+$ , 421.1627, found 421.1618.

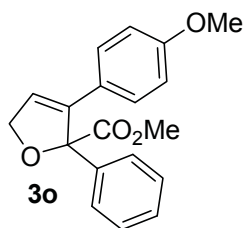

Column chromatography afforded the desired product **3o** in 64% yield as colorless liquid:  $^1\text{H NMR}$  (400 MHz,  $\text{CDCl}_3$ ):  $\delta$  7.33 – 7.17 (m, 5H), 7.13 (d,  $J = 8$  Hz, 2H), 6.66 (d,  $J = 8$  Hz, 2H), 6.32 (t,  $J = 2$  Hz, 1H), 4.88 (dd,  $J_1 = 20$  Hz,  $J_2 = 4$  Hz, 1H), 4.83 (dd,  $J_1 = 20$  Hz,  $J_2 = 4$  Hz, 1H), 3.70 (s, 3H), 3.67 (s, 3H).  $^{13}\text{C NMR}$  (100 MHz,  $\text{CDCl}_3$ ): 172.2, 159.3, 140.4, 139.5, 129.2, 128.7, 128.4, 128.3, 128.2, 127.5, 126.6, 125.0, 94.7, 74.8, 55.2, 52.6. HRMS: calcd for  $\text{C}_{19}\text{H}_{18}\text{O}_4\text{Na}$   $[\text{M}+\text{Na}]^+$ , 333.1103, found 333.1114.

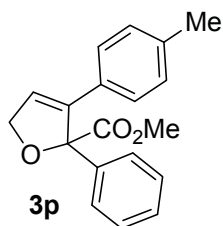

Column chromatography afforded the desired product **3p** in 60% yield as colorless liquid:  $^1\text{H NMR}$  (400 MHz,  $\text{CDCl}_3$ ):  $\delta$  7.30 – 7.24 (m, 5H), 7.08 (d,  $J = 8$  Hz, 2H), 6.94 (d,  $J = 8$  Hz, 2H), 6.39 (t,  $J = 2$  Hz, 1H), 4.90 (dd,  $J_1 = 16$  Hz,  $J_2 = 4$  Hz, 1H), 4.85 (dd,  $J_1 = 16$  Hz,  $J_2 = 4$  Hz, 1H), 3.71 (s, 3H), 2.22 (s, 3H).  $^{13}\text{C NMR}$  (100 MHz,  $\text{CDCl}_3$ ): 172.1, 140.9, 139.1, 137.8, 129.6, 128.7, 128.3, 128.2, 127.7, 127.4, 126.0, 94.7, 74.8, 52.5, 21.4. HRMS: calcd for  $\text{C}_{19}\text{H}_{18}\text{O}_3\text{Na}$   $[\text{M}+\text{Na}]^+$ , 317.1154, found 317.1138.

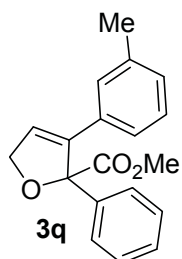

Column chromatography afforded the desired product **3q** in 61% yield as colorless liquid:  $^1\text{H NMR}$  (400 MHz,  $\text{CDCl}_3$ ):  $\delta$  7.28–7.24 (m, 5H), 7.18–6.99 (m, 4H), 6.38 (t,  $J = 4$  Hz, 1H), 4.91 (dd,  $J_1 = 12$  Hz,  $J_2 = 4$  Hz, 1H), 4.85 (dd,  $J_1 = 12$  Hz,  $J_2 = 4$  Hz, 1H), 3.71 (s, 3H), 2.18 (s, 3H).  $^{13}\text{C NMR}$  (100 MHz,  $\text{CDCl}_3$ ): 172.1, 141.3, 139.4, 137.5, 132.6, 128.9, 128.7, 128.5, 128.3, 128.2, 128.0, 127.9, 127.8, 127.4, 127.2, 126.7, 125.2, 125.1, 94.7, 74.8, 52.6, 21.1. HRMS: calcd for  $\text{C}_{19}\text{H}_{18}\text{O}_3\text{Na}$   $[\text{M}+\text{Na}]^+$ , 317.1154, found 317.1166.



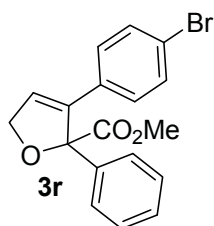

Column chromatography afforded the desired product **3r** in 50% yield as colorless liquid:  $^1\text{H NMR}$  (400 MHz,  $\text{CDCl}_3$ ):  $\delta$  7.27 – 7.24 (m, 6H), 7.19 (s, 1H), 7.04 (d,  $J$  = 8 Hz, 2H), 6.43 (t,  $J$  = 4 Hz, 1H), 4.90 (dd,  $J_1$  = 12 Hz,  $J_2$  = 4 Hz, 1H), 4.86 (dd,  $J_1$  = 12 Hz,  $J_2$  = 4 Hz, 1H), 3.72 (s, 3H).  $^{13}\text{C NMR}$  (100 MHz,  $\text{CDCl}_3$ ): 171.9, 140.3, 139.0, 131.2, 129.5, 128.6, 128.4, 127.2, 122.1, 94.7, 74.8, 52.6. HRMS: calcd for  $\text{C}_{18}\text{H}_{15}\text{O}_3\text{BrNa}$   $[\text{M}+\text{Na}]^+$ , 381.0102, found 381.0083.

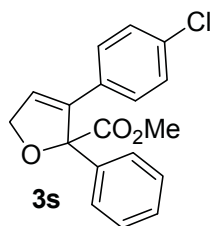

Column chromatography afforded the desired product **3s** in 55% yield as colorless liquid:  $^1\text{H NMR}$  (400 MHz,  $\text{CDCl}_3$ ):  $\delta$  7.26 (s, 5H), 7.10 (s, 4H), 6.11 (t,  $J$  = 4 Hz, 1H), 4.91 (dd,  $J_1$  = 12 Hz,  $J_2$  = 4 Hz, 1H), 4.85 (dd,  $J_1$  = 12 Hz,  $J_2$  = 4 Hz, 1H), 3.72 (s, 3H).  $^{13}\text{C NMR}$  (100 MHz,  $\text{CDCl}_3$ ): 170.9, 159.0, 158.1, 128.9, 128.7, 127.5, 124.6, 122.8, 121.2, 111.4, 106.7, 98.7, 79.7, 63.5, 52.4. HRMS: calcd for  $\text{C}_{18}\text{H}_{15}\text{O}_3\text{ClNa}$   $[\text{M}+\text{Na}]^+$ , 337.0607, found 337.0623.

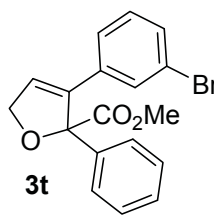

Column chromatography afforded the desired product **3t** in 52% yield as colorless liquid:  $^1\text{H NMR}$  (400 MHz,  $\text{CDCl}_3$ ):  $\delta$  7.36 – 7.19 (m, 7H), 7.03 – 6.69 (m, 2H), 6.41 (t,  $J$  = 4 Hz, 1H), 4.92 (dd,  $J_1$  = 12 Hz,  $J_2$  = 4 Hz, 1H), 4.87 (dd,  $J_1$  = 12 Hz,  $J_2$  = 4 Hz, 1H), 3.72 (s, 3H).  $^{13}\text{C NMR}$  (100 MHz,  $\text{CDCl}_3$ ): 171.8, 140.2, 139.0, 134.8, 130.9, 128.6, 128.4, 128.1, 127.2, 126.6, 128.4, 128.1, 127.2, 126.6, 122.0, 94.7, 52.6. HRMS: calcd for  $\text{C}_{18}\text{H}_{15}\text{O}_3\text{BrNa}$   $[\text{M}+\text{Na}]^+$ , 381.0102, found 381.0121.

### Procedure for hydrolysis of 2, 5-Dihydrofuran **3a**

To a 20 mL flask, **3a** (0.2 mmol) and LiOH (1.0 mmol, 5.0 eq) dissolved in the mixture of water, THF and methanol was added at 0 °C. After refluxed for 4 h, the reaction was cooled down and quenched with 1 N HCl. The aqueous phase was extracted with ethyl acetate for 3 times. The combined organic phase was dried with anhydrous  $\text{Na}_2\text{SO}_4$ . The solvent was removed with vacuum rotator, affording the crude product. Then 0.2 g Silicon gel was added to make the uniformed sample for the chromatography. The pure products were obtained with dichloromethane and methanol (v/v = 50 : 1-10 : 1) as elution.

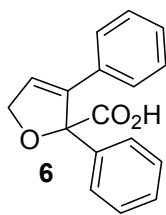

Column chromatography afforded the desired product **6** in 78% yield as colorless solid:  $^1\text{H NMR}$ (400 MHz,  $d_6$ -acetone):  $\delta$ 13.00 (br, 1H), 7.36-7.31 (m, 10H), 6.81 (t,  $J = 2$  Hz, 1H), 4.85 (dd,  $J_1 = 16$  Hz,  $J_2 = 2$  Hz, 1H), 4.80 (dd,  $J_1 = 16$  Hz,  $J_2 = 2$  Hz, 1H).  $^{13}\text{C NMR}$  (100 MHz,  $d_6$ -acetone): 172.5, 140.0, 139.9, 132.4, 127.9, 127.6, 127.5, 127.4, 93.8, 74.3. HRMS: calcd for  $\text{C}_{17}\text{H}_{14}\text{O}_3\text{Na}$   $[\text{M}+\text{Na}]^+$ , 289.0841, found 289.0834.

### Procedure for PCC oxidation of 2, 5-Dihydrofuran **3a**<sup>3</sup>.

To a 20 mL flask, **3a** (0.2 mmol) was added and PCC (0.4 mmol, 2.0 eq) dissolved in  $(\text{CHCl}_3)_2$  and KOAc (0.4 mmol, 2.0 eq) was added. After refluxed for 2 h, the reaction was cooled down and quenched with saturated  $\text{NH}_4\text{Cl}$ . The aqueous phase was extracted with ethyl acetate for 3 times. The combined organic phase was dried with anhydrous  $\text{Na}_2\text{SO}_4$ . The solvent was removed with vacuum rotator, affording the crude product. Then 0.2 g Silica gel was added to make the uniformed sample for the chromatography. The pure products were obtained with petrol ether and ethyl acetate (v/v = 10 : 1-5: 1) as elution.

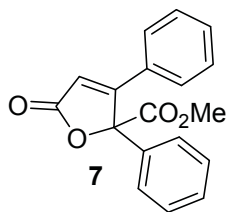

Column chromatography afforded the desired product **7** in 89% yield as yellow solid:  $^1\text{H NMR}$ (400 MHz,  $\text{CDCl}_3$ ):  $\delta$ 7.42 – 7.27 (m, 10H), 6.55 (s, 1H), 3.72 (s, 3H).  $^{13}\text{C NMR}$  (100 MHz,  $\text{CDCl}_3$ ): 170.9, 168.0, 165.0, 134.7, 131.4, 129.7, 129.3, 128.8, 128.0, 116.6, 91.0, 53.7. HRMS: calcd for  $\text{C}_{18}\text{H}_{15}\text{O}_4\text{Na}$   $[\text{M}+\text{Na}]^+$ , 295.0970, found 295.0982.

### Procedure for reduction of 2, 5-Dihydrofuran **3a**

A 2-necked flask was dried with heat gun, and cooled down in the Nitrogen atmosphere. To the flask, **3a** (0.2 mmol) and 5 mL THF was added and cooled down to 0 °C, then  $\text{LiAlH}_4$  (0.4 mmol, 2.0 eq) was added in portions. After refluxed for 2 hrs, the reaction was cooled down and quenched with saturated  $\text{NH}_4\text{Cl}$ . The aqueous phase was extracted with ethyl acetate for 3 times. The combined organic phase was dried with anhydrous  $\text{Na}_2\text{SO}_4$ . The solvent was removed with vacuum rotator, and 0.2 g Silica gel was added to make the uniformed sample for the chromatography. The pure products were obtained with petrol ether and ethyl acetate (v/v = 8 : 1-5: 1) as elution.

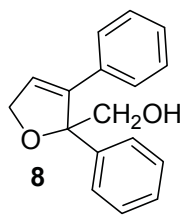

Column chromatography afforded the desired product **8** in 54% yield as yellow solid:  $^1\text{H}$ NMR(400 MHz,  $\text{CDCl}_3$ ): $\delta$ 7.21 – 7.08 (m, 10H), 6.11 (t,  $J$  = 1.6 Hz, 1H), 4.84 (dd,  $J_1$ = 13.4 Hz,  $J_2$ = 1.6 Hz, 1H), 4.79 (dd,  $J_1$ = 13.4 Hz,  $J_2$ = 1.6 Hz, 1H), 4.03 (br, 2 H), 2.20 (br, 1H).  $^{13}\text{C}$ NMR (100 MHz,  $\text{CDCl}_3$ ): 142.8, 141.4,

133.8, 128.3, 128.2, 127.9, 127.8, 127.7, 126.0, 125.5, 94.4, 74.1, 65.9. HRMS: calcd for  $\text{C}_{17}\text{H}_{16}\text{O}_2\text{Na}$   $[\text{M}+\text{Na}]^+$ , 275.1048, found 275.1057.

## References

1. Y. Liang, Y.-X.Xie, and J.-H. Li, *J. Org. Chem.* 2006, **71**, 379.
2. (a) W. A. J.Starmans, L.Thijs and B.Zwanenburg, *Tetrahedron* 1998, **54**, 629; (b)M. K.-W.Choi, W.-Y. Yu, and C.-M.Che, *Org. Lett.* 2005, **7**, 1081; (c) W.-Y. Yu, Y.-T. Tsoi, Z. Y. Zhou, and A. S. C.Chan, *Org. Lett.* 2009, **11**, 469.
3. F. Bonadies and C. Bonini. *Syn. Comm.*, 1988, **18**, 1573.

# NMR Spectra

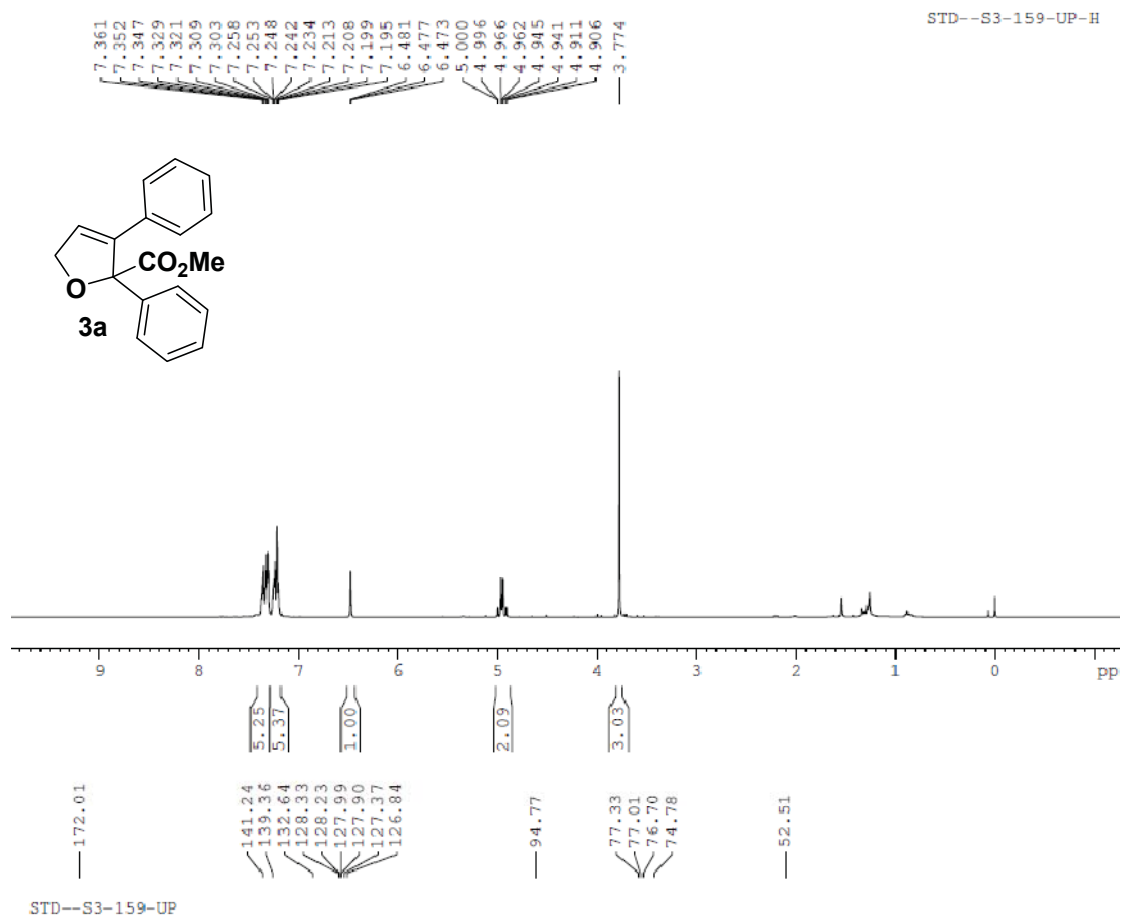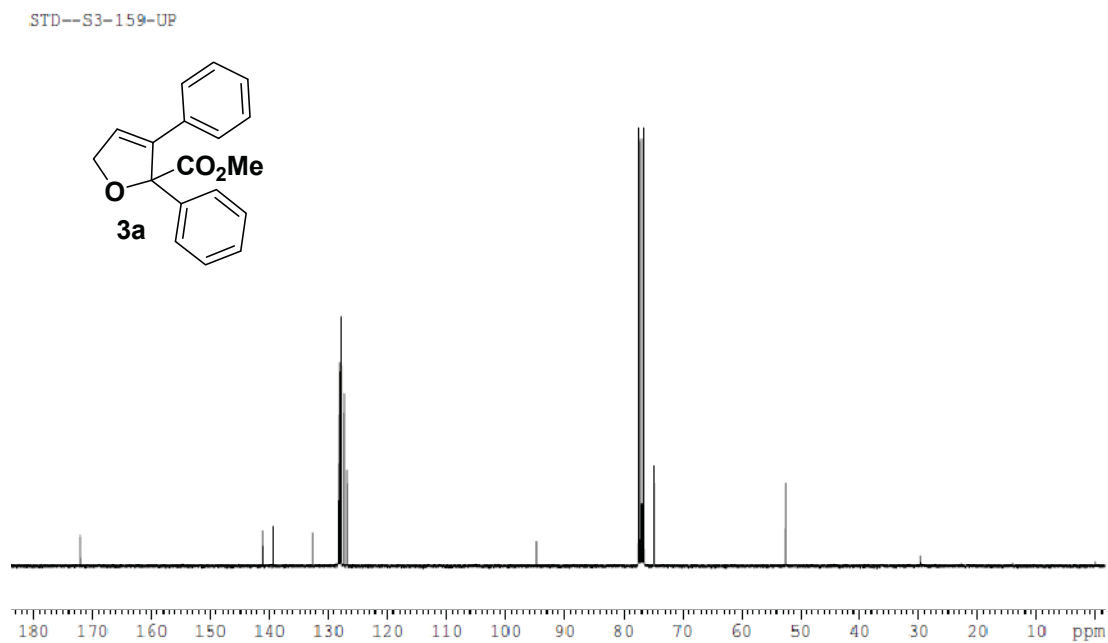

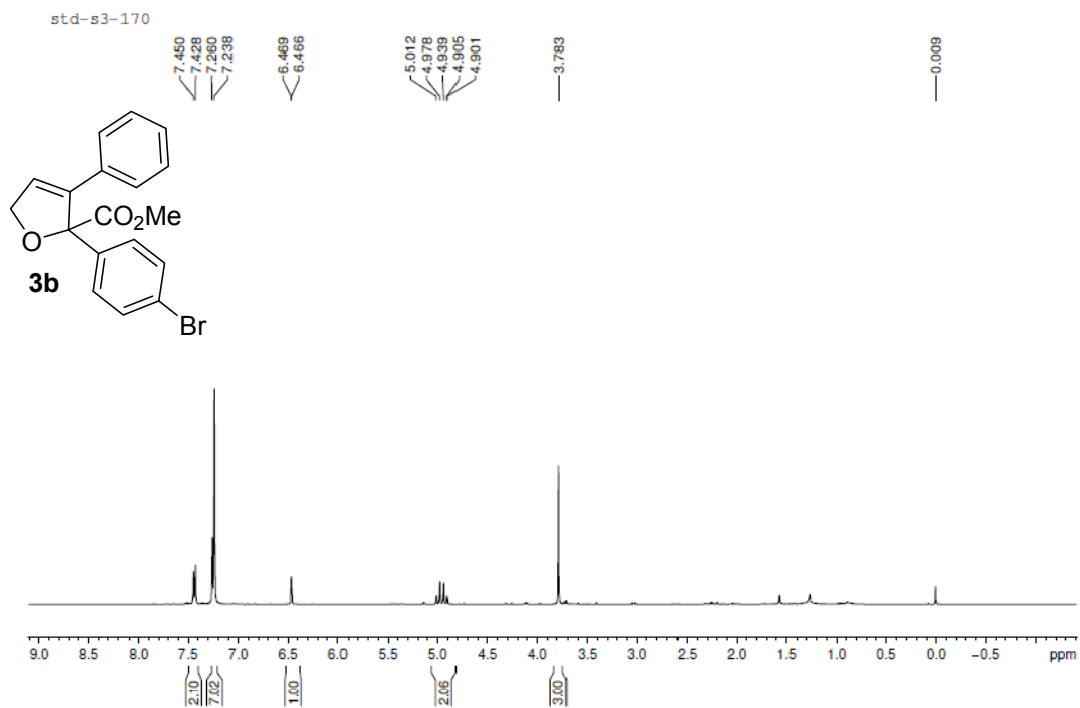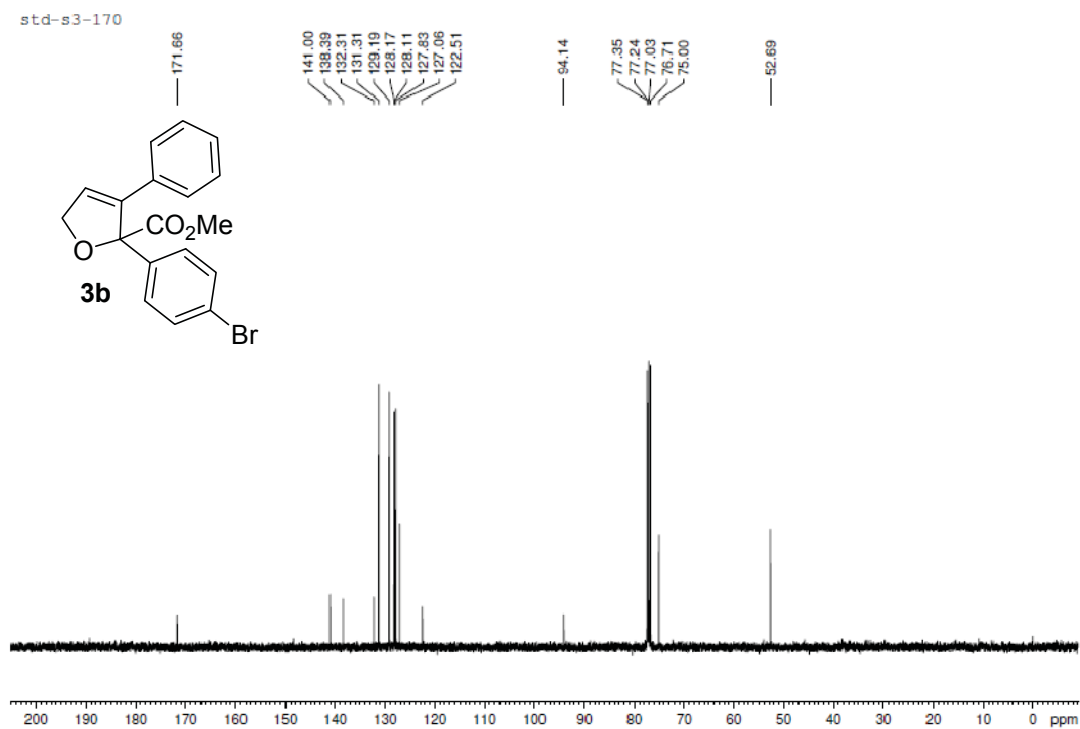

std-s3-173

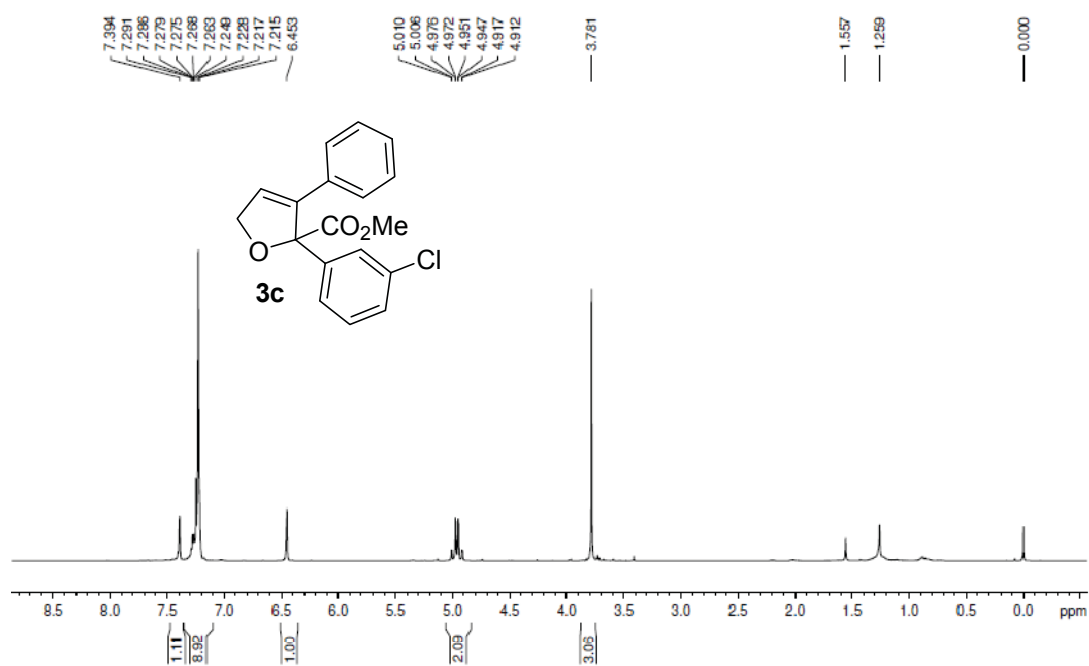

std-s3-173

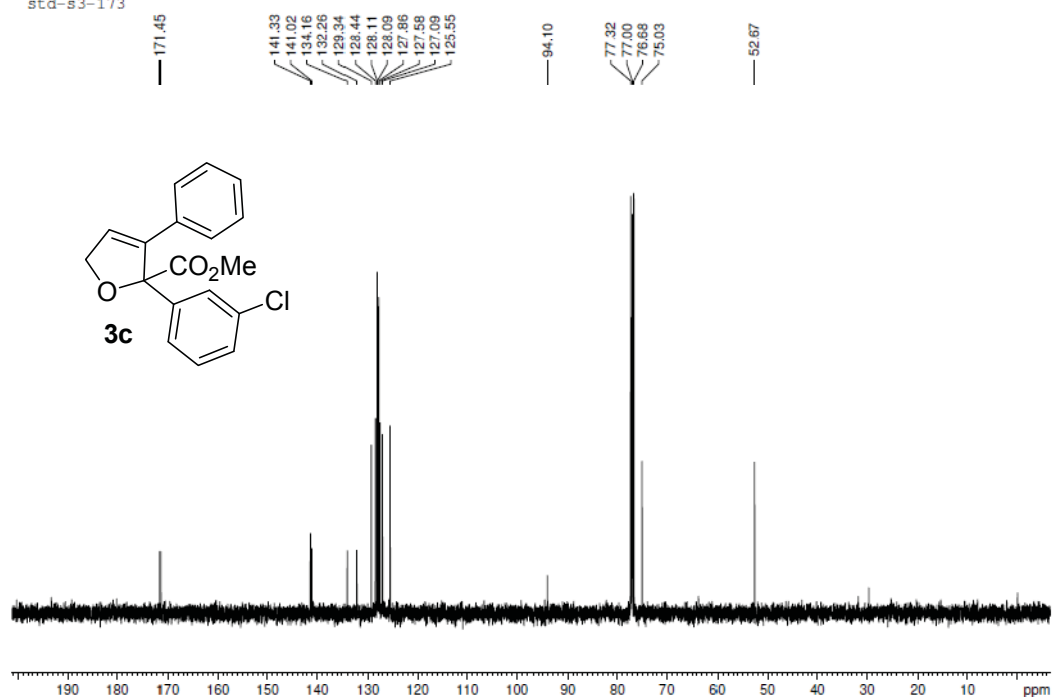

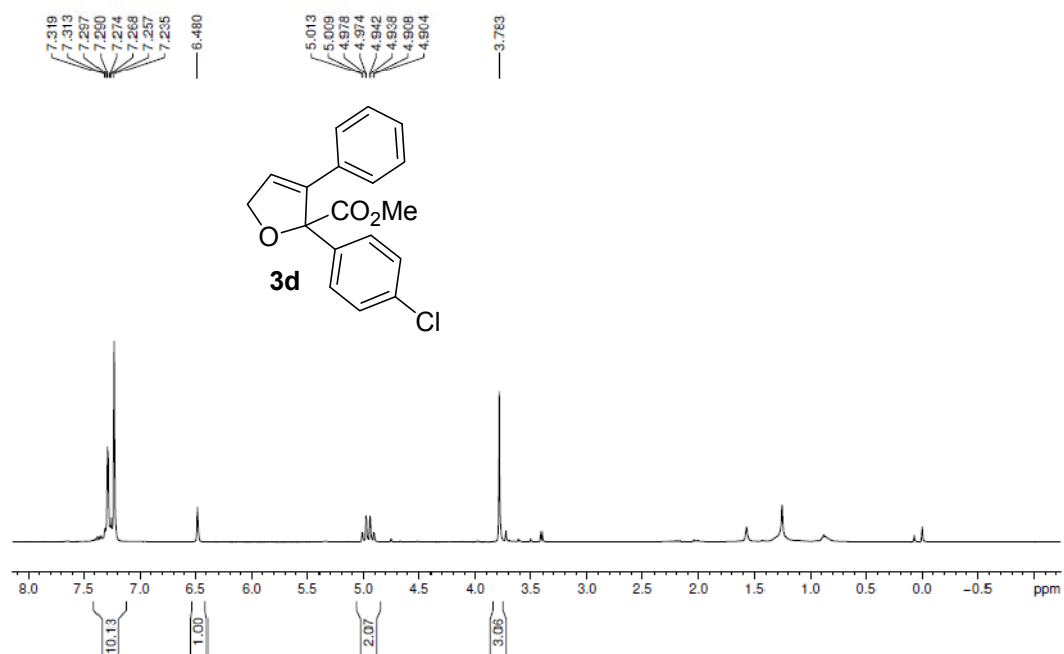

STD-S3-189

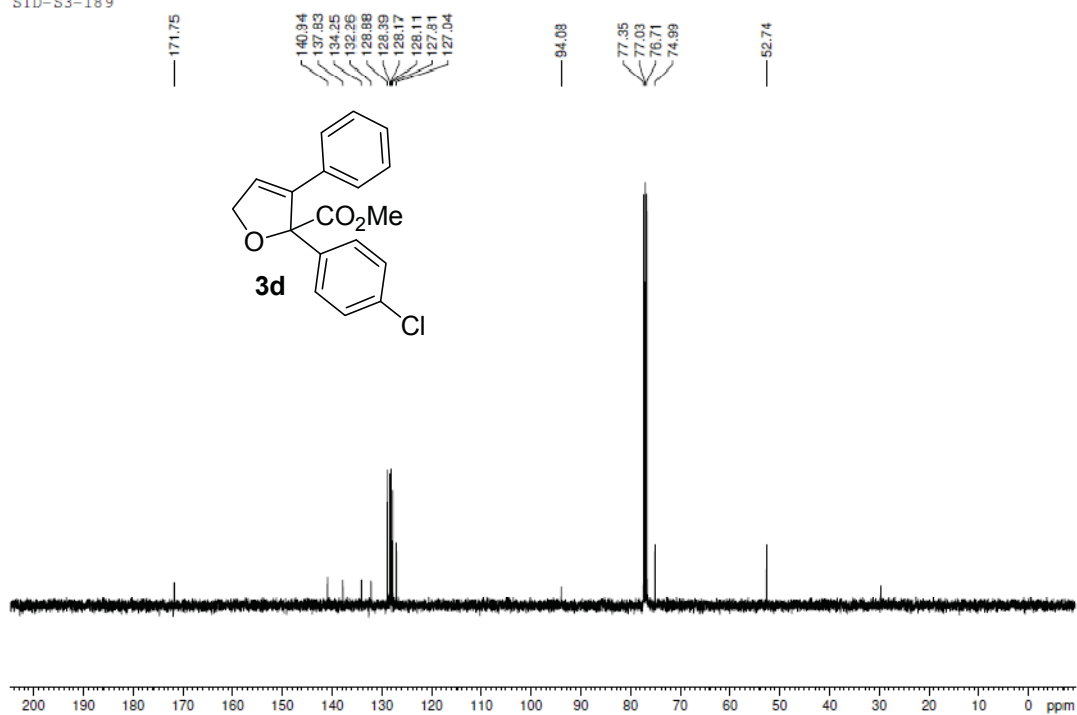

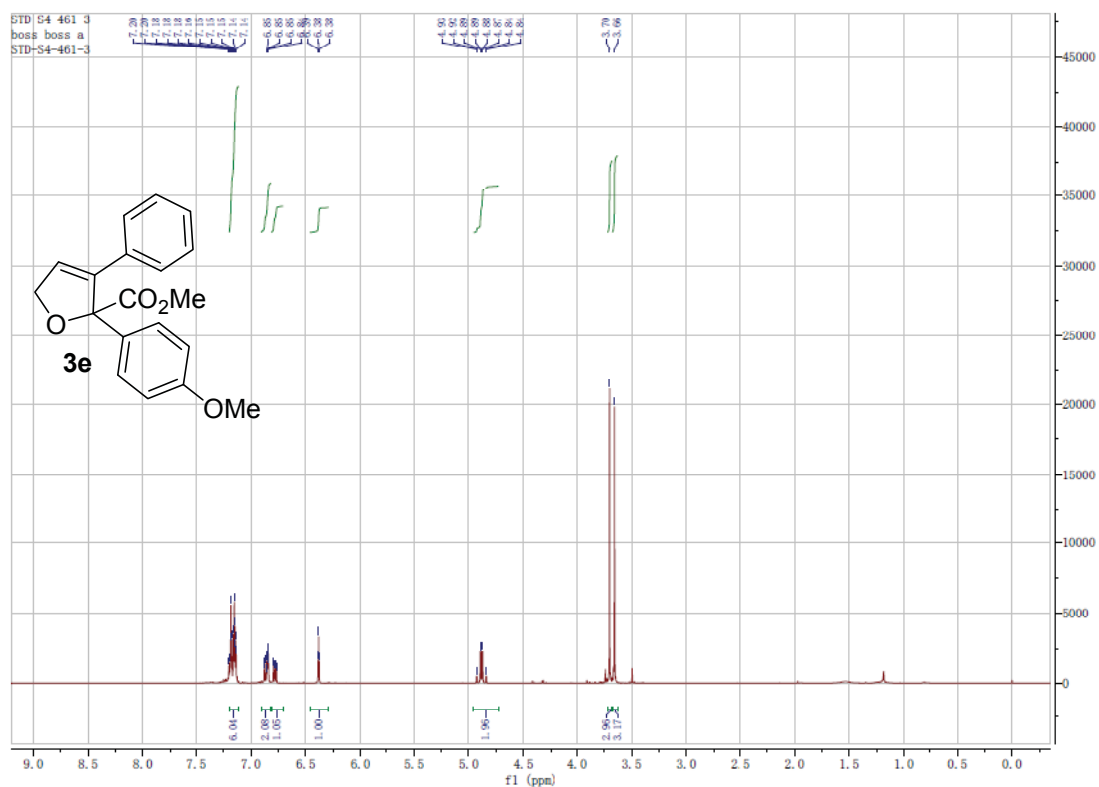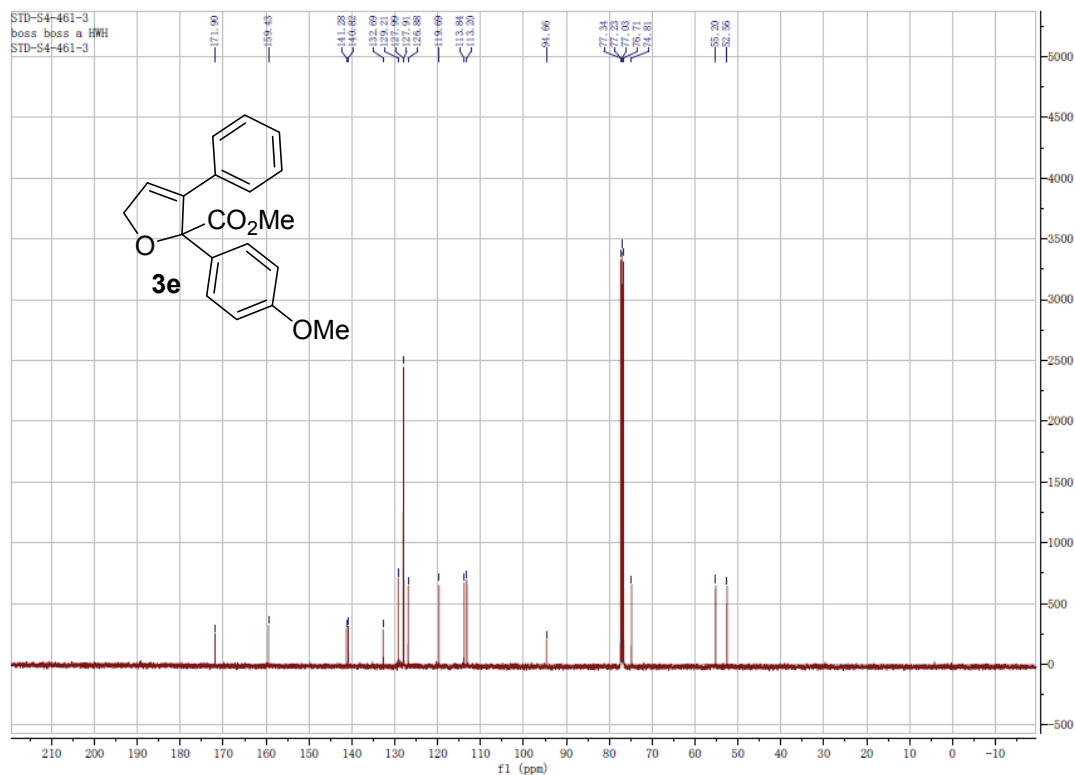



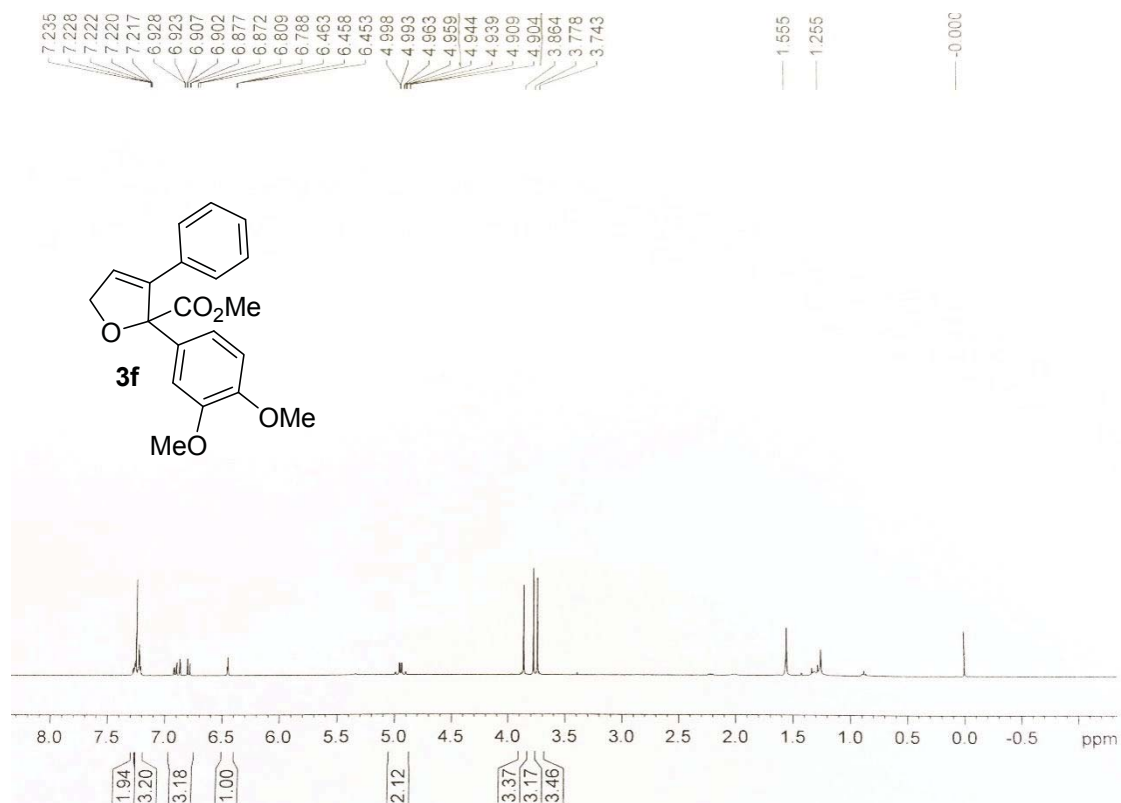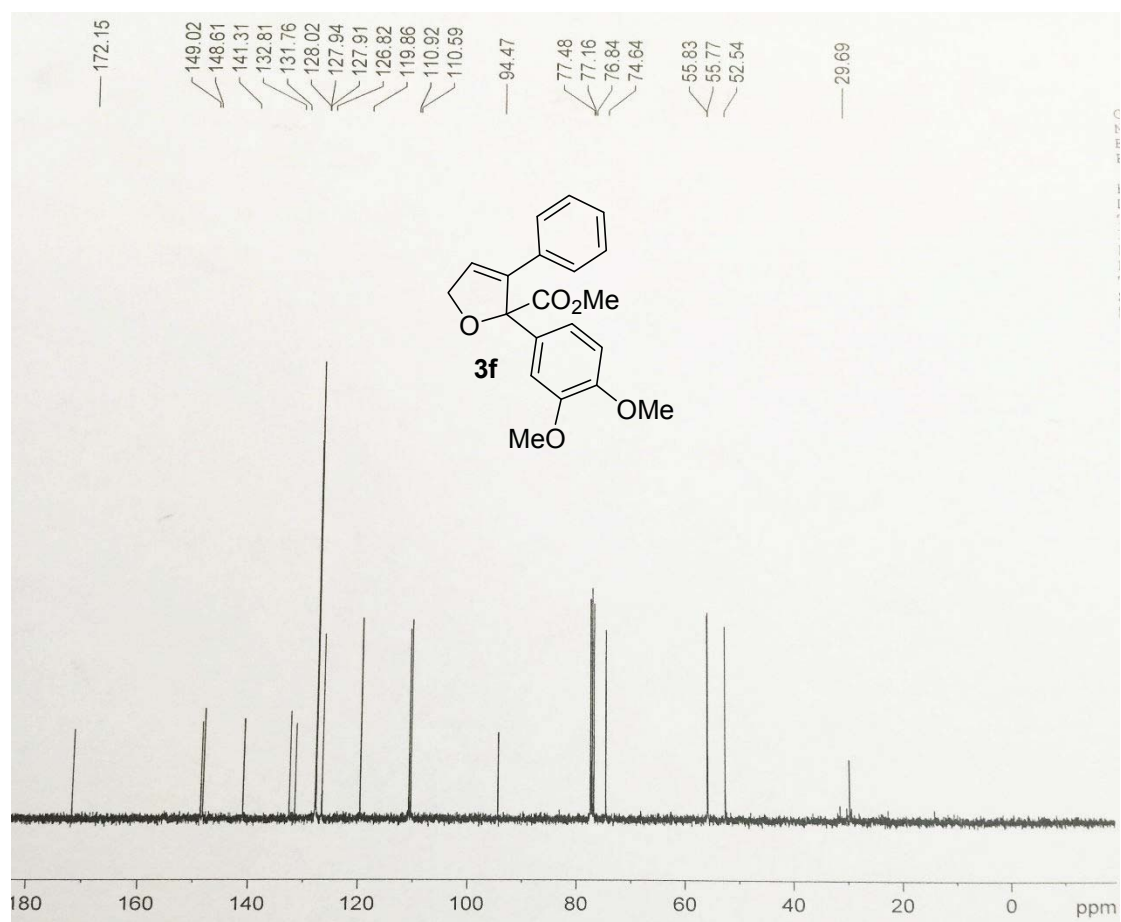

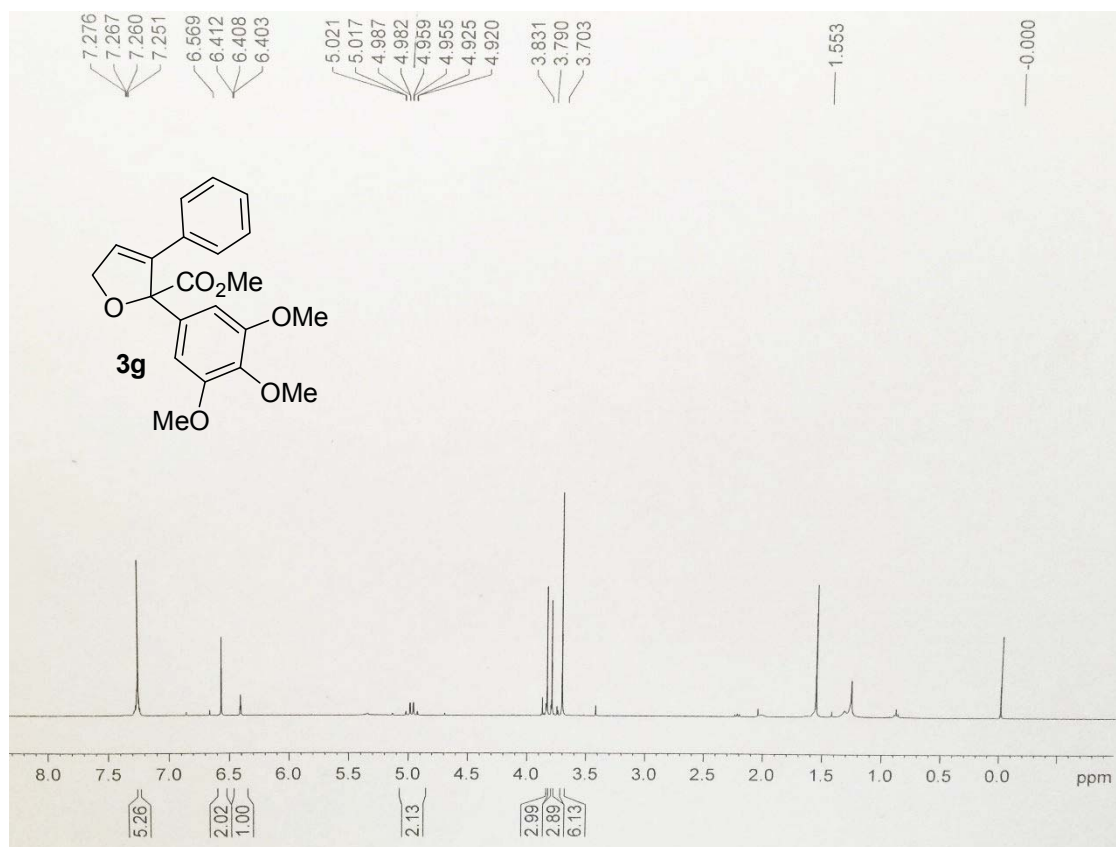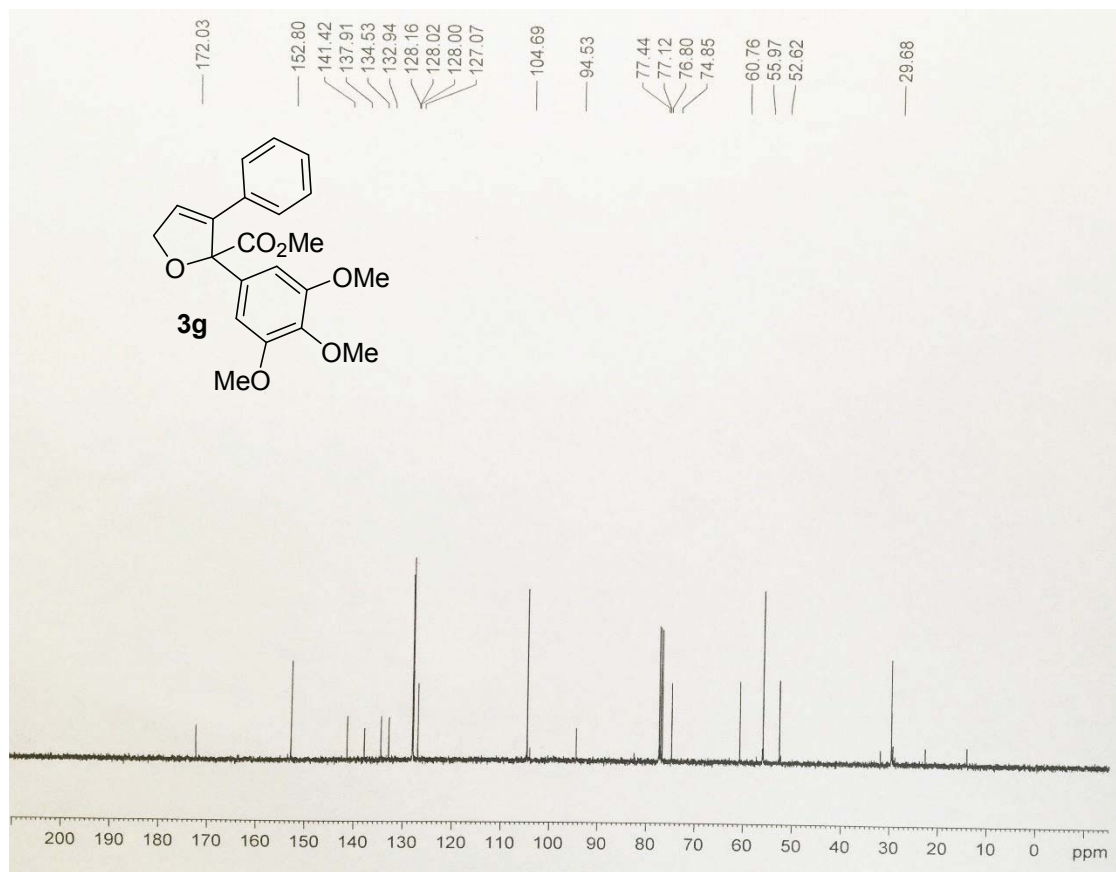

std-s3-197-down

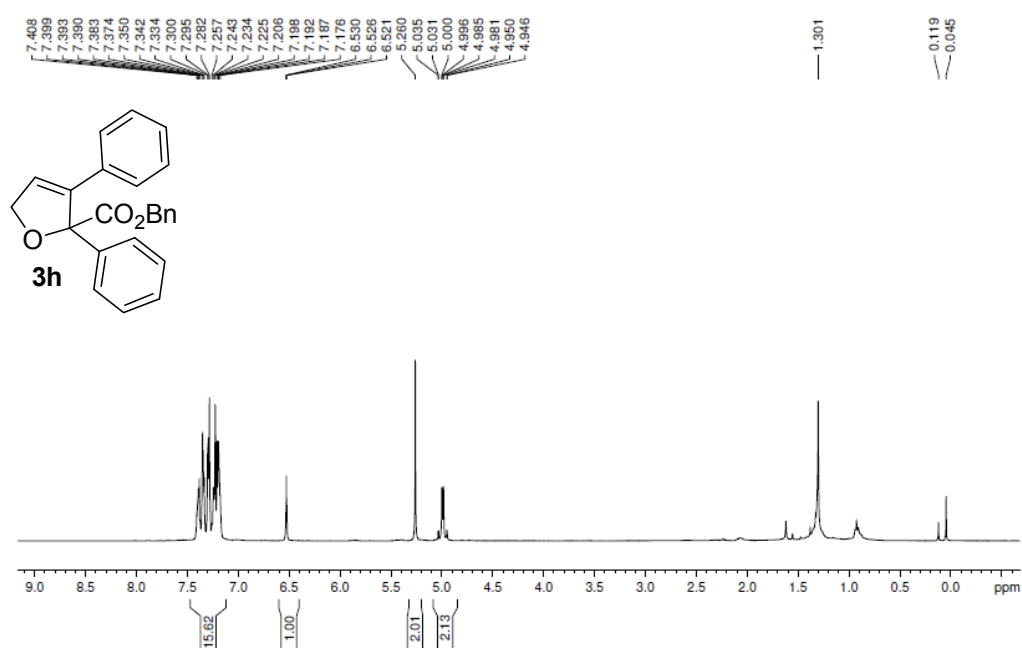

std-s3-197-down c

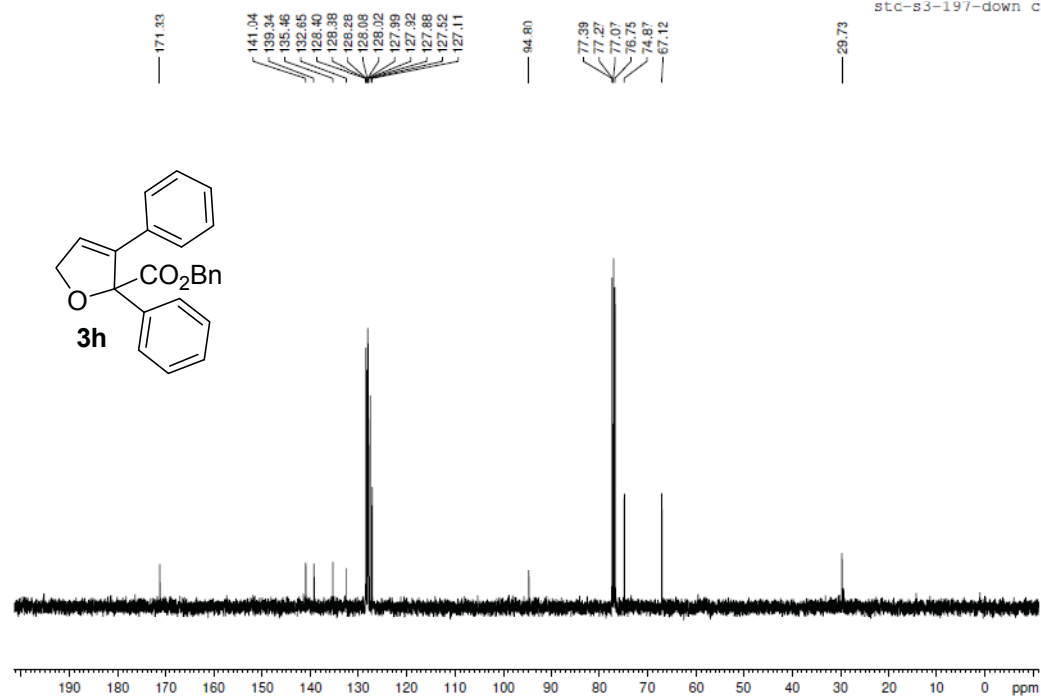

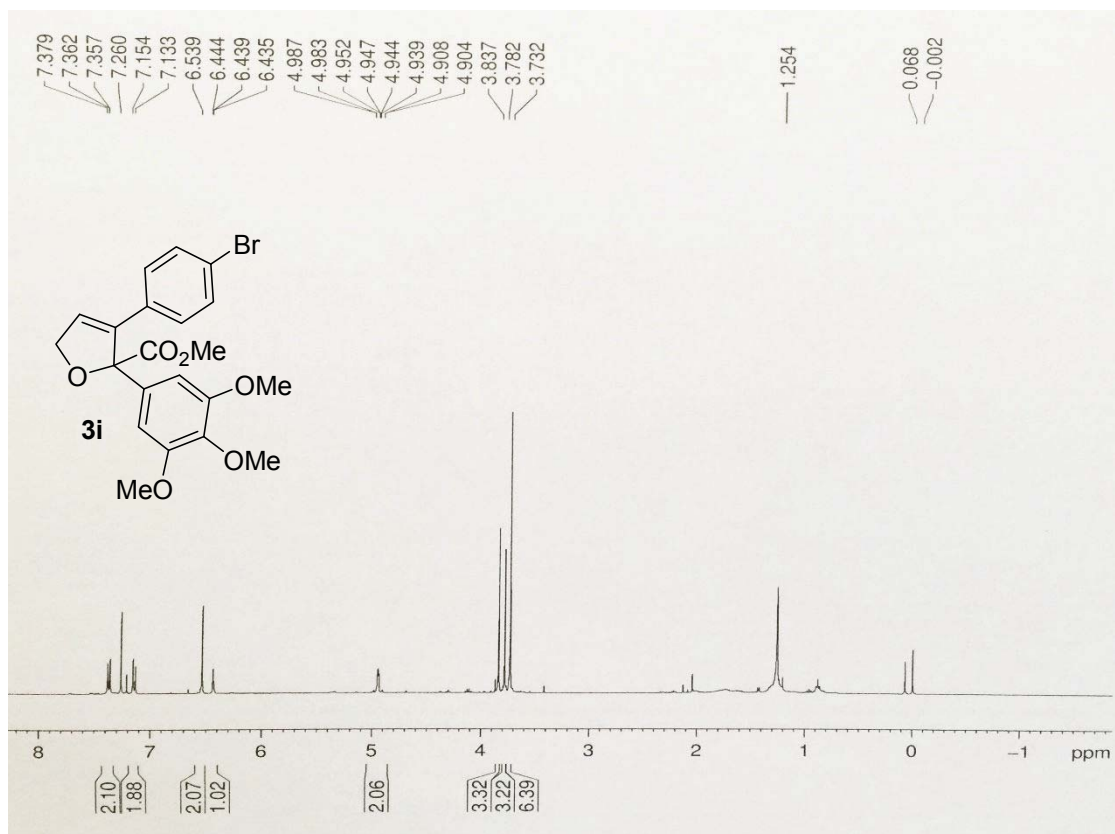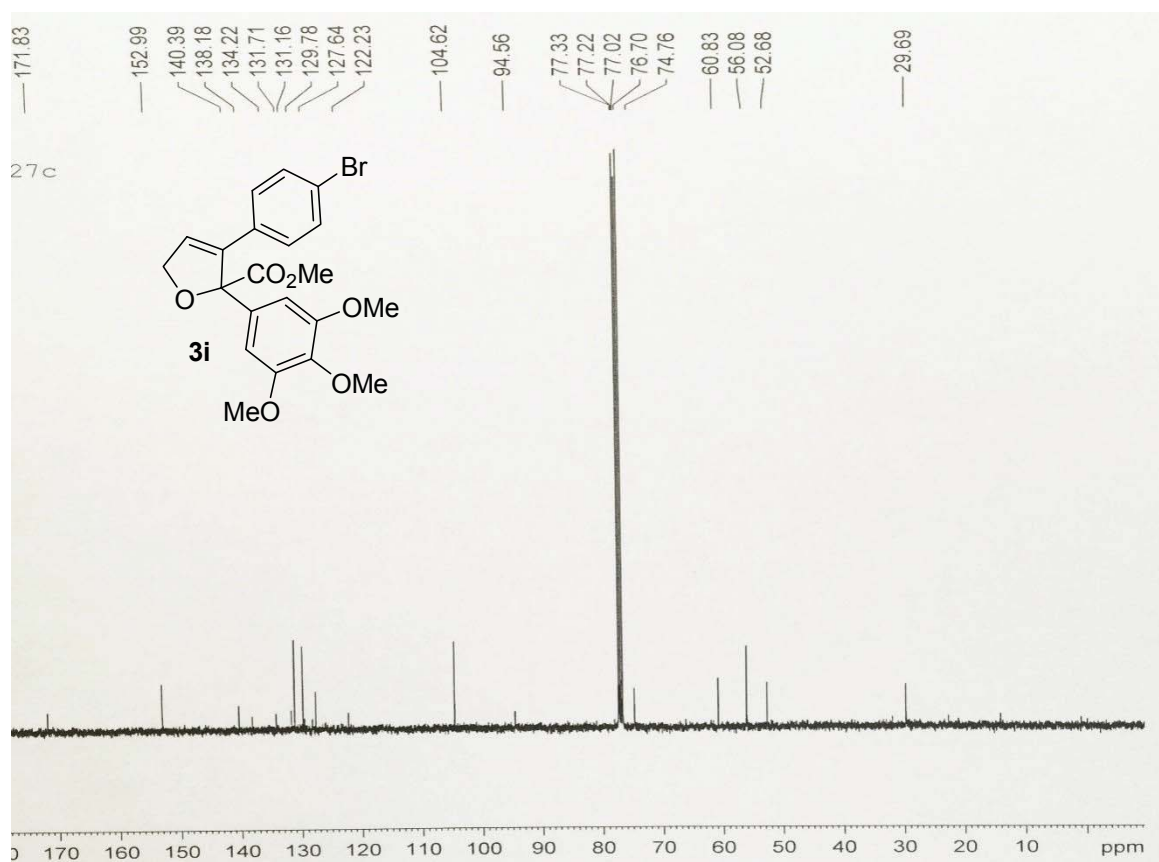

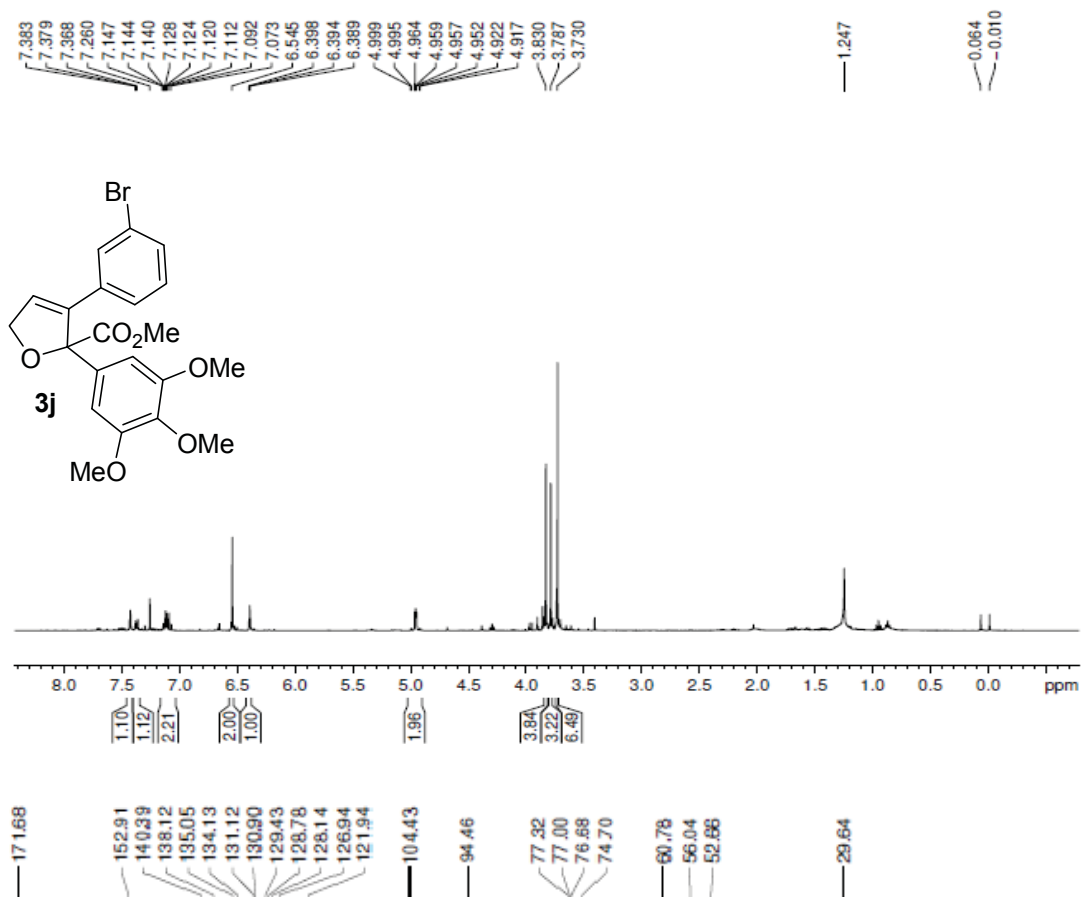

STD-S5-650 C

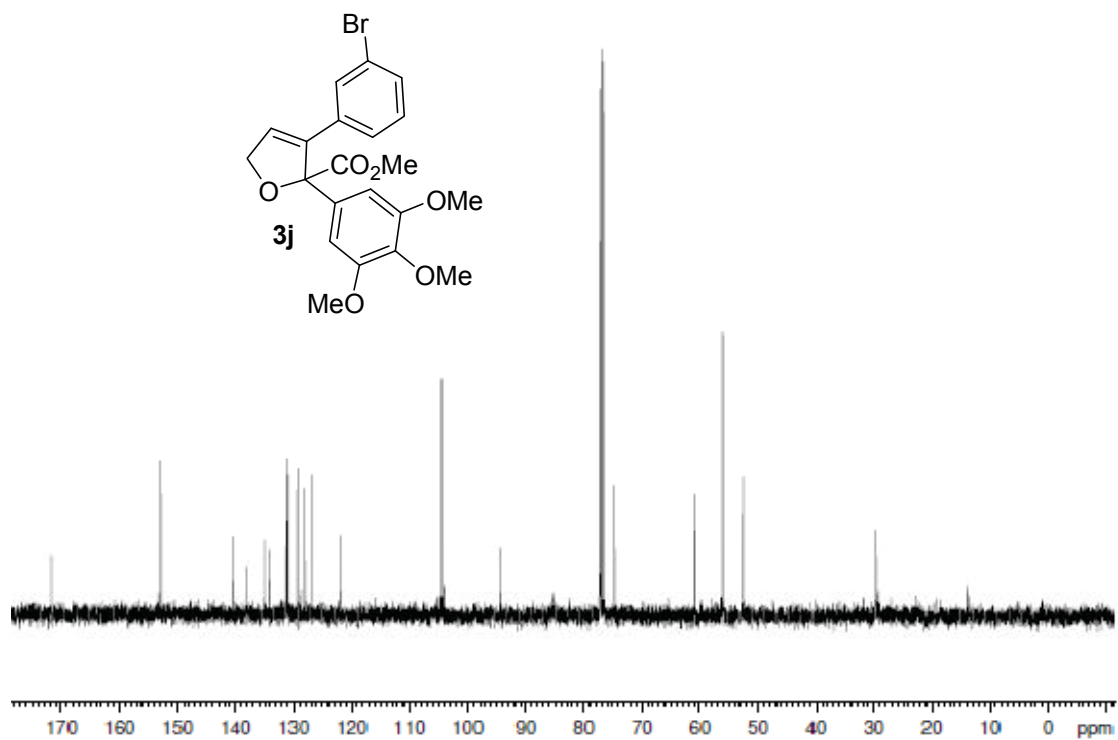

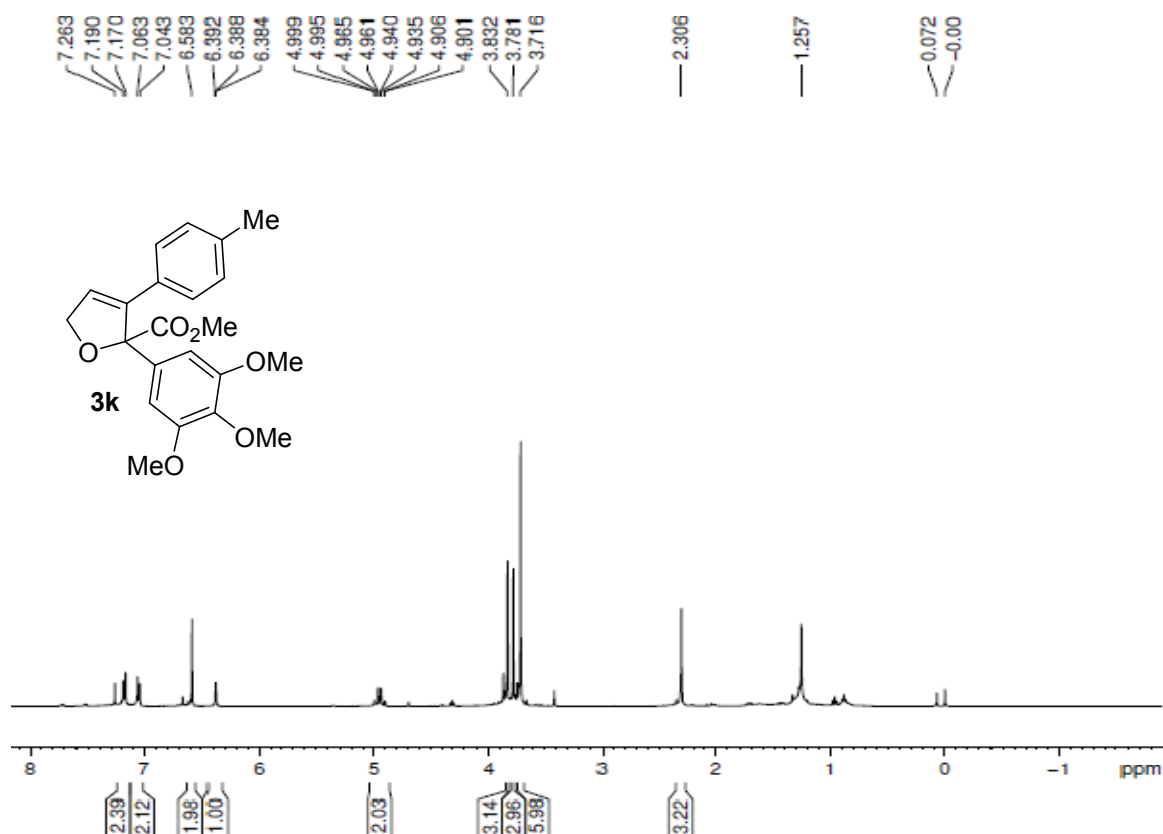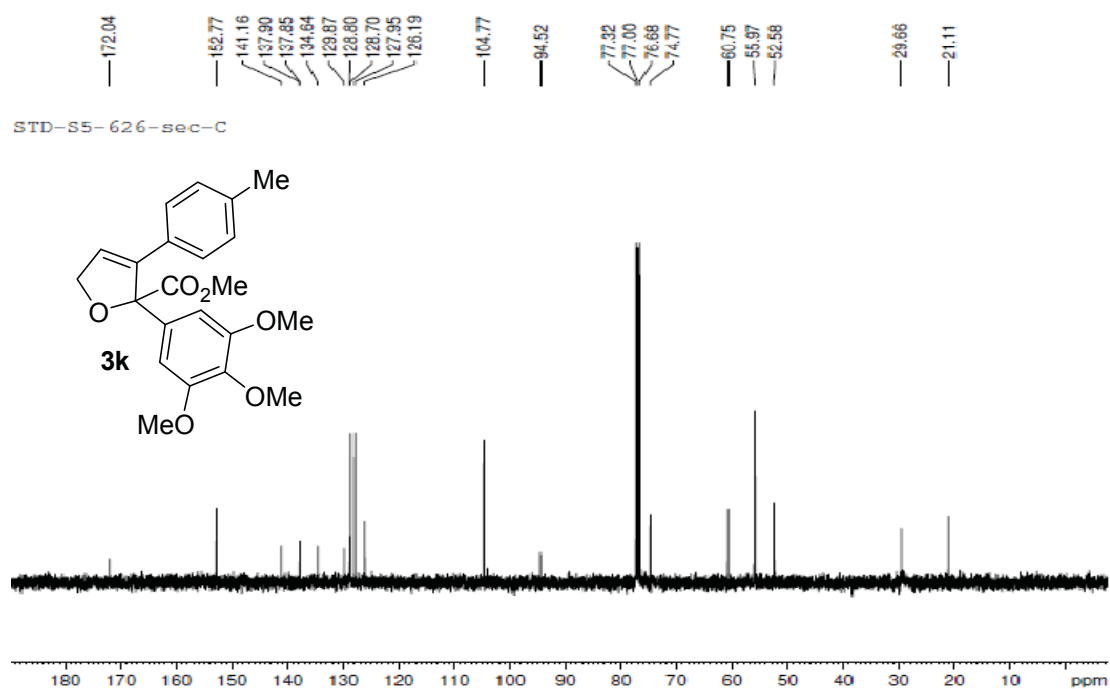

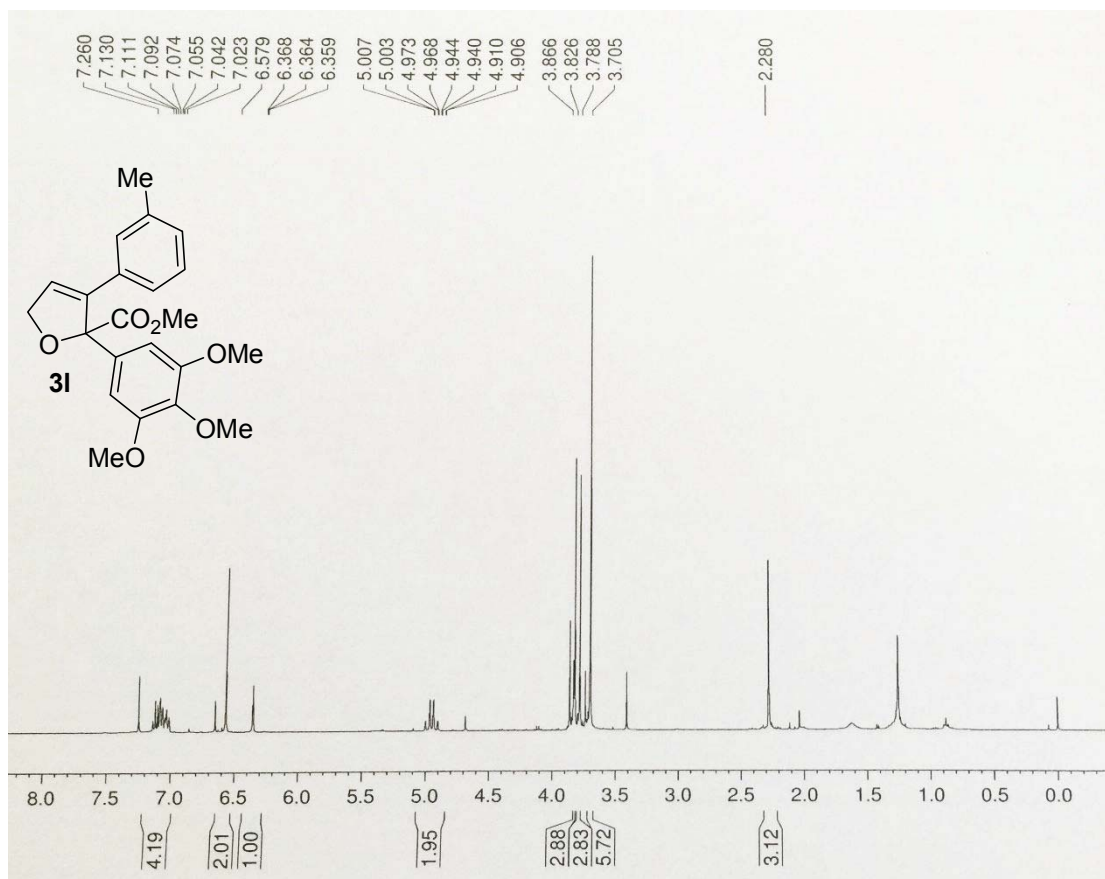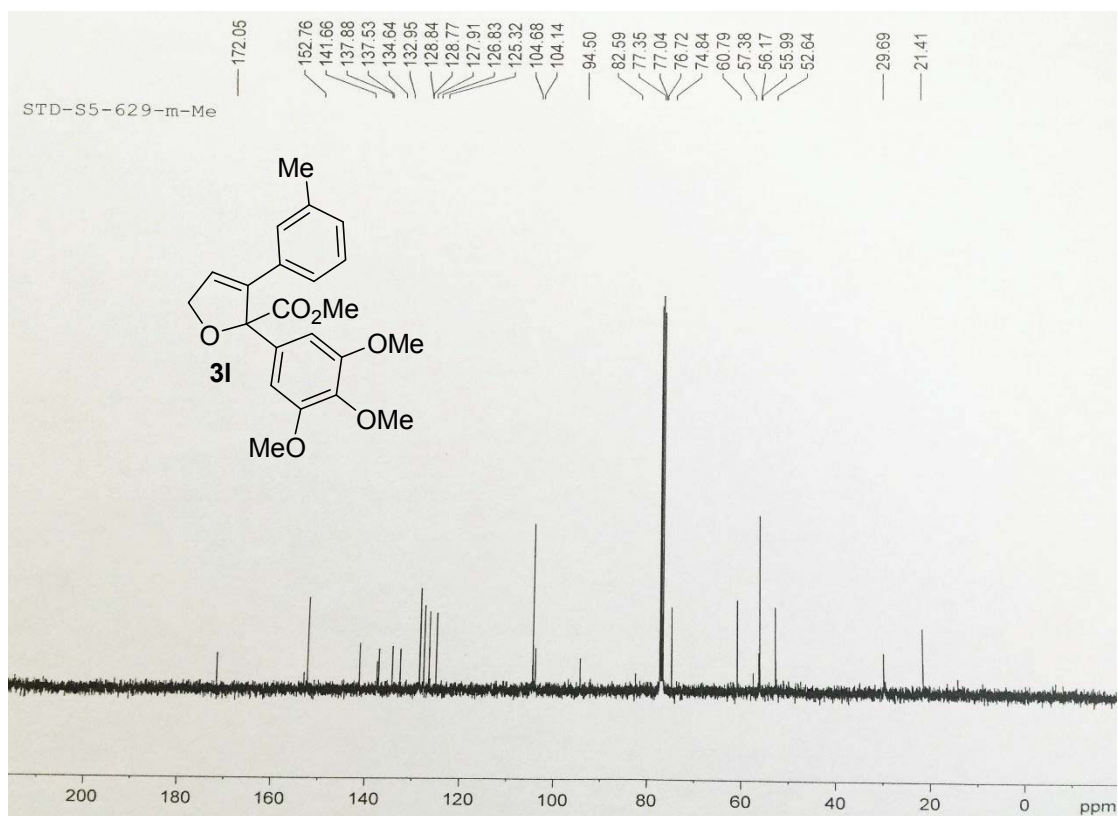



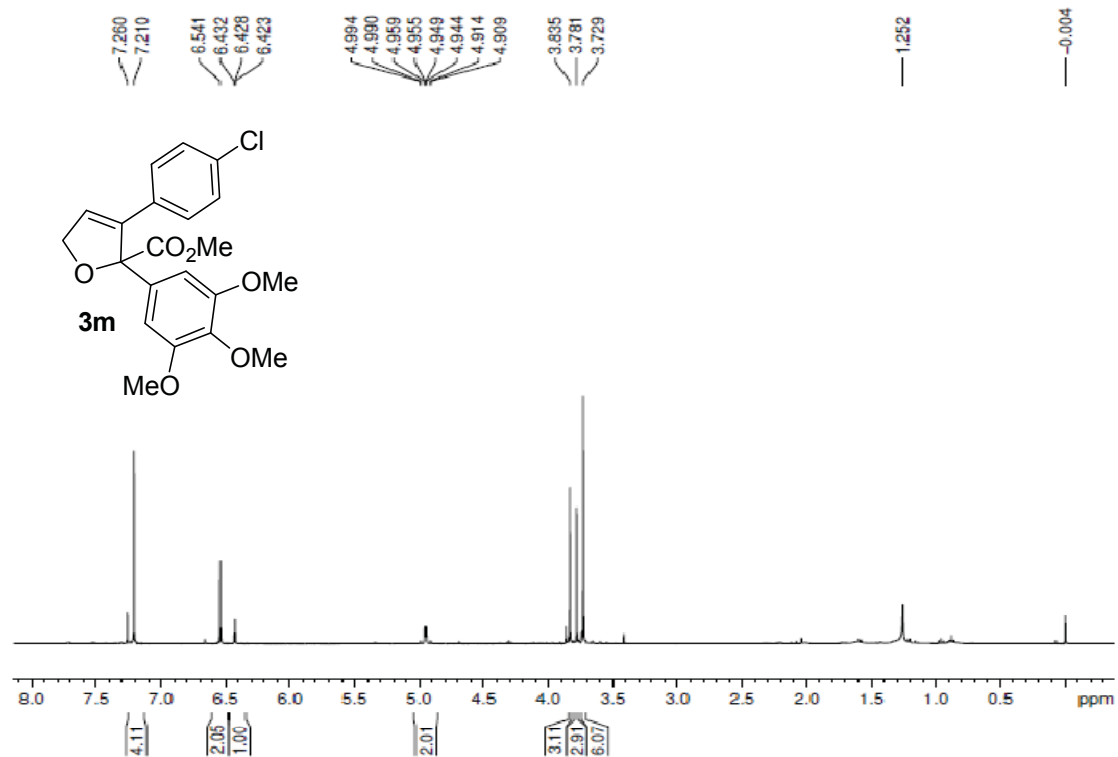

STD-S5-628-sec-C

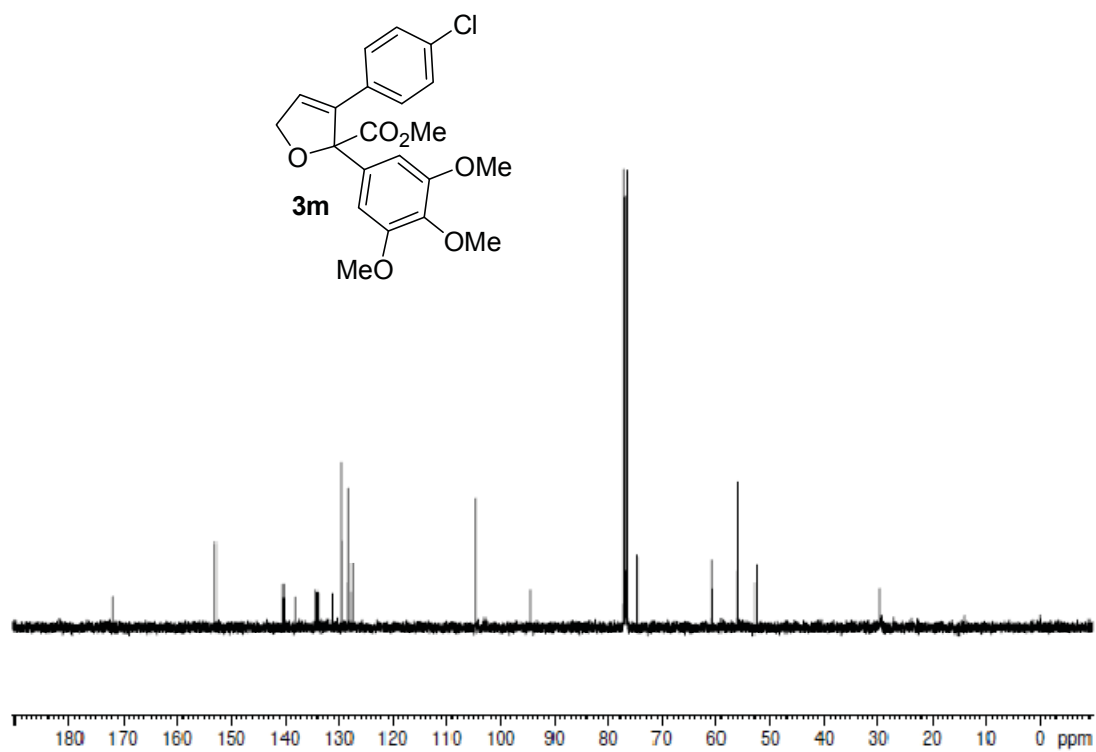



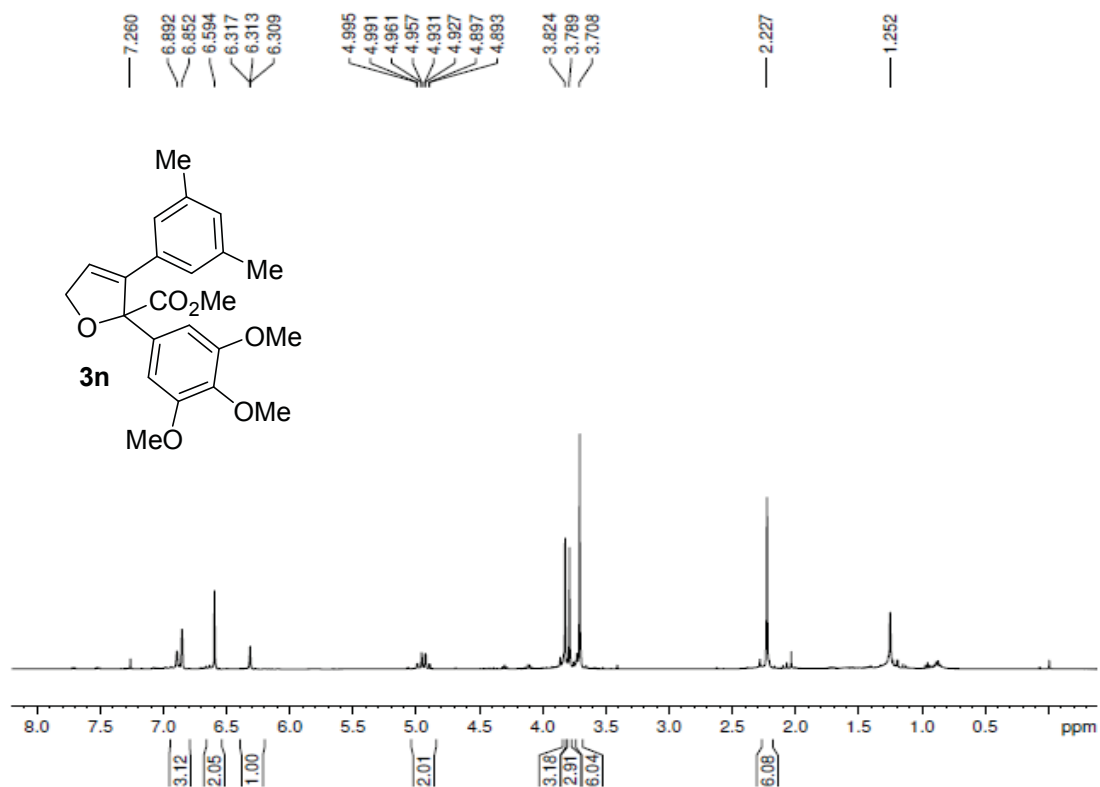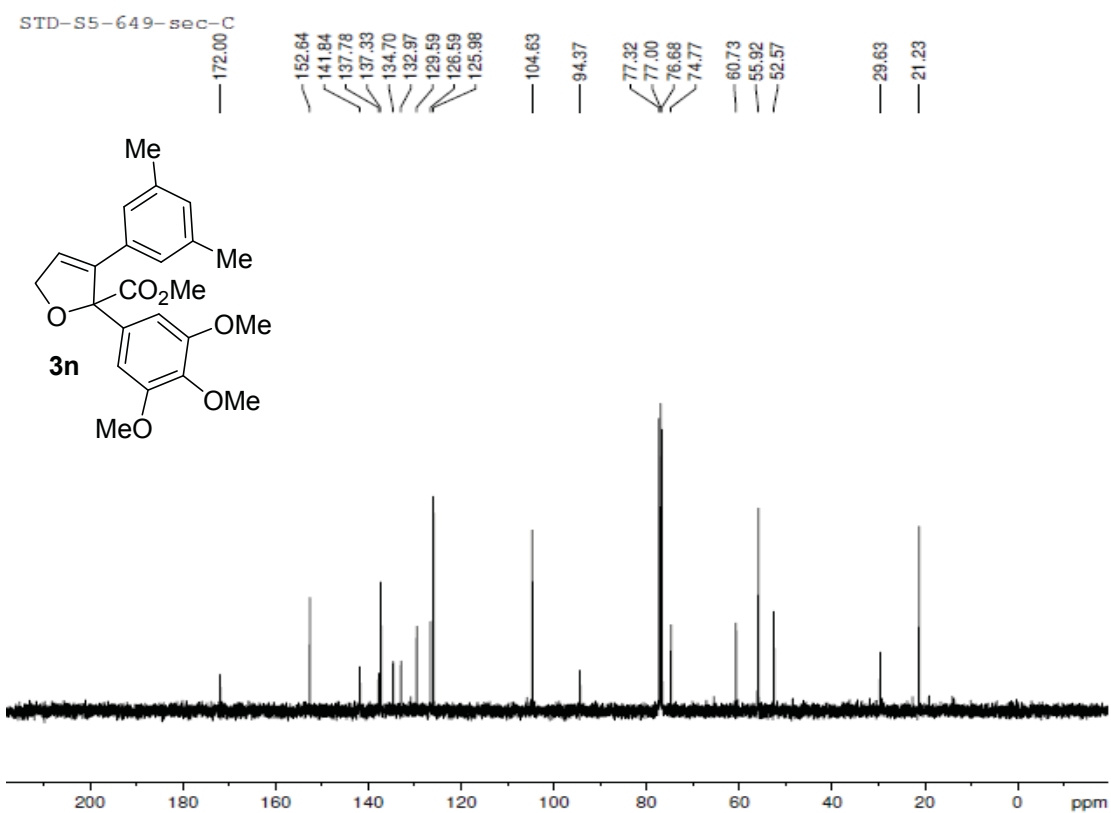

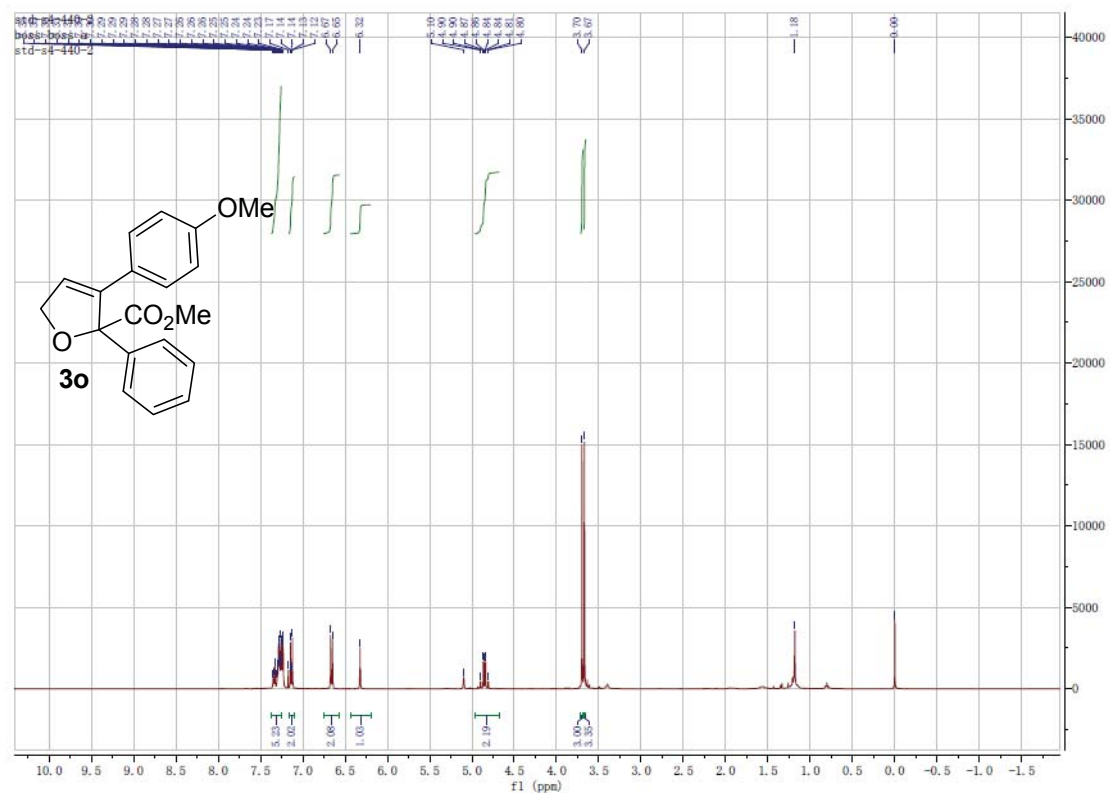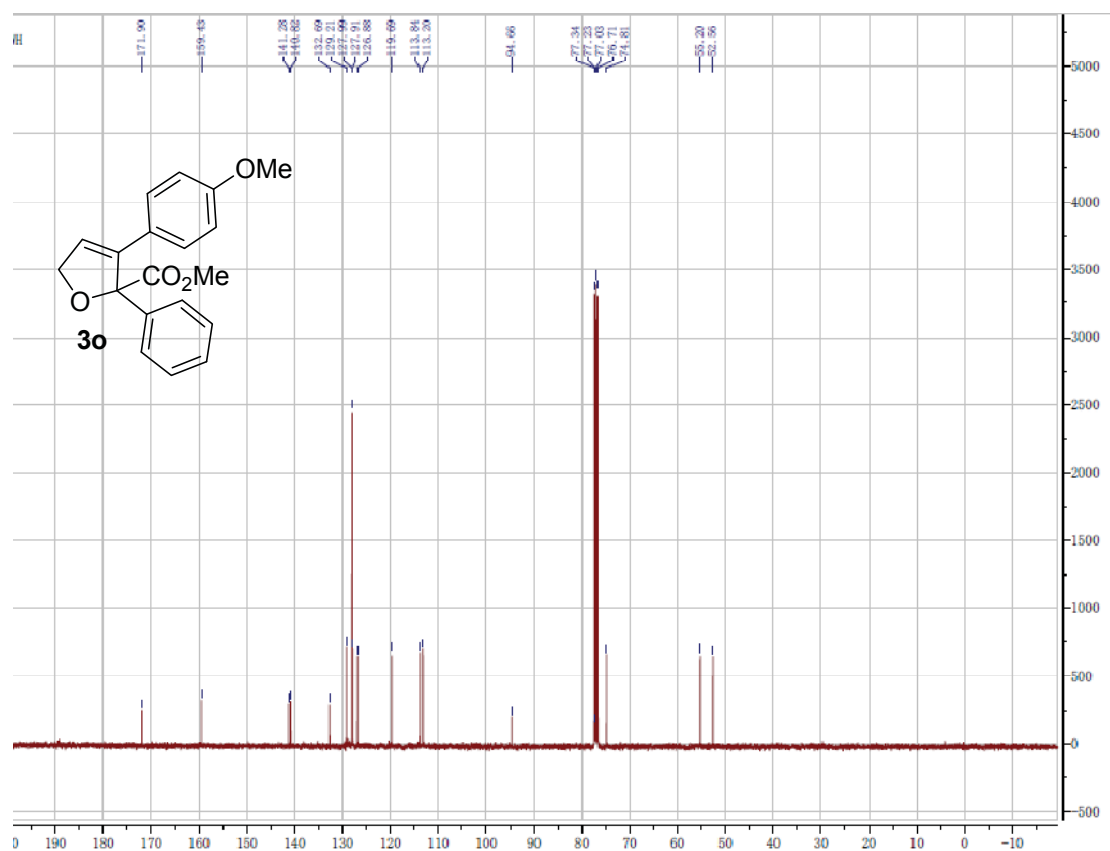

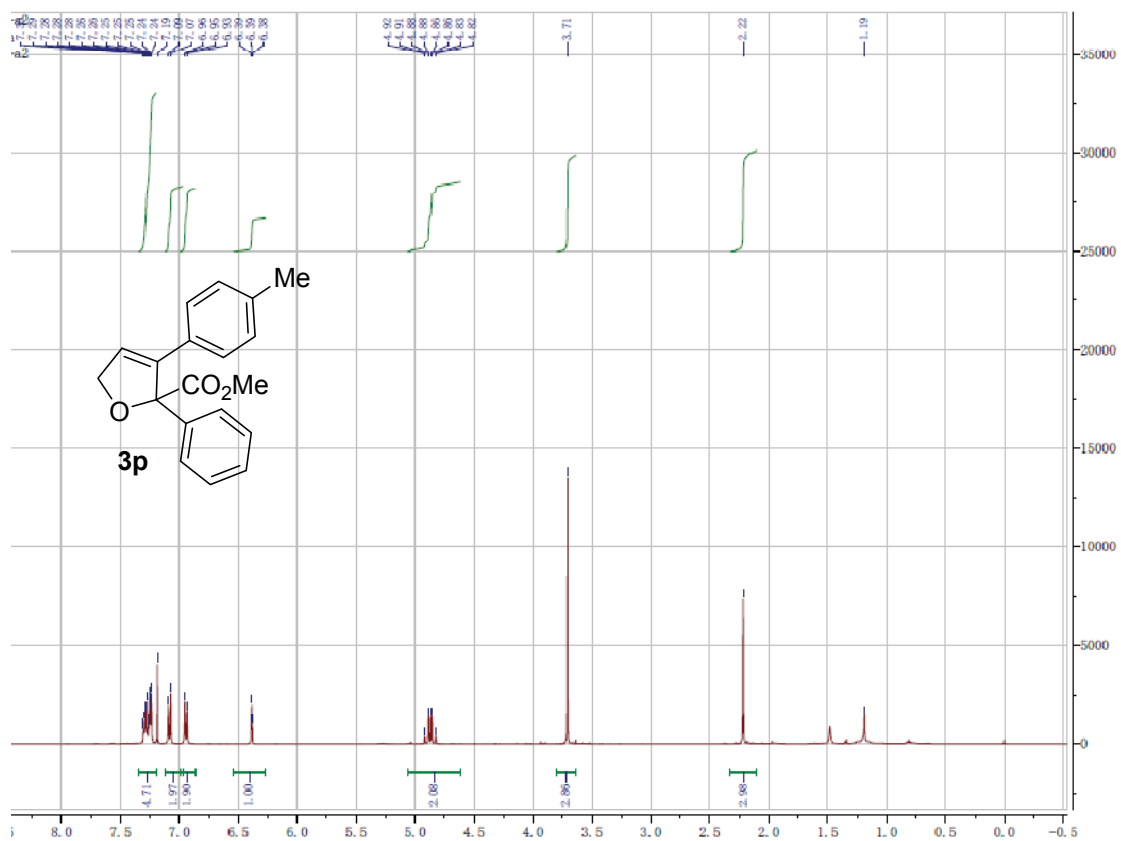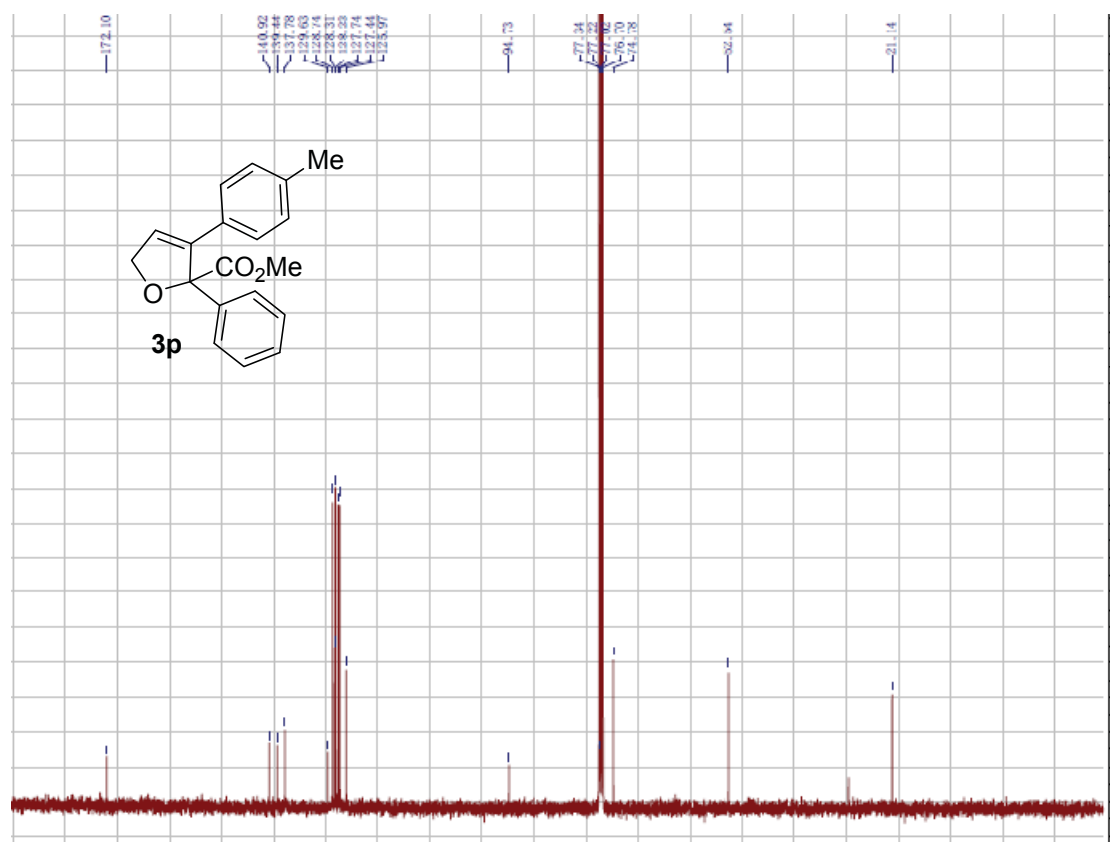

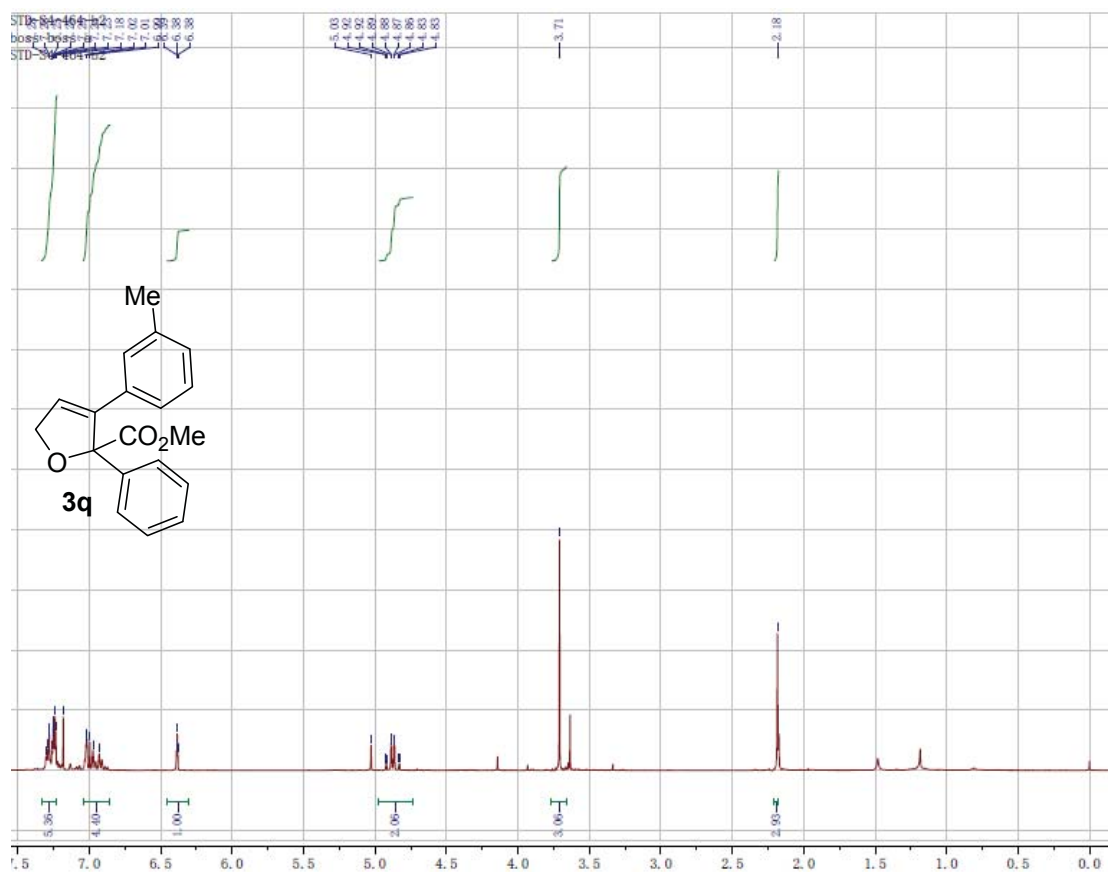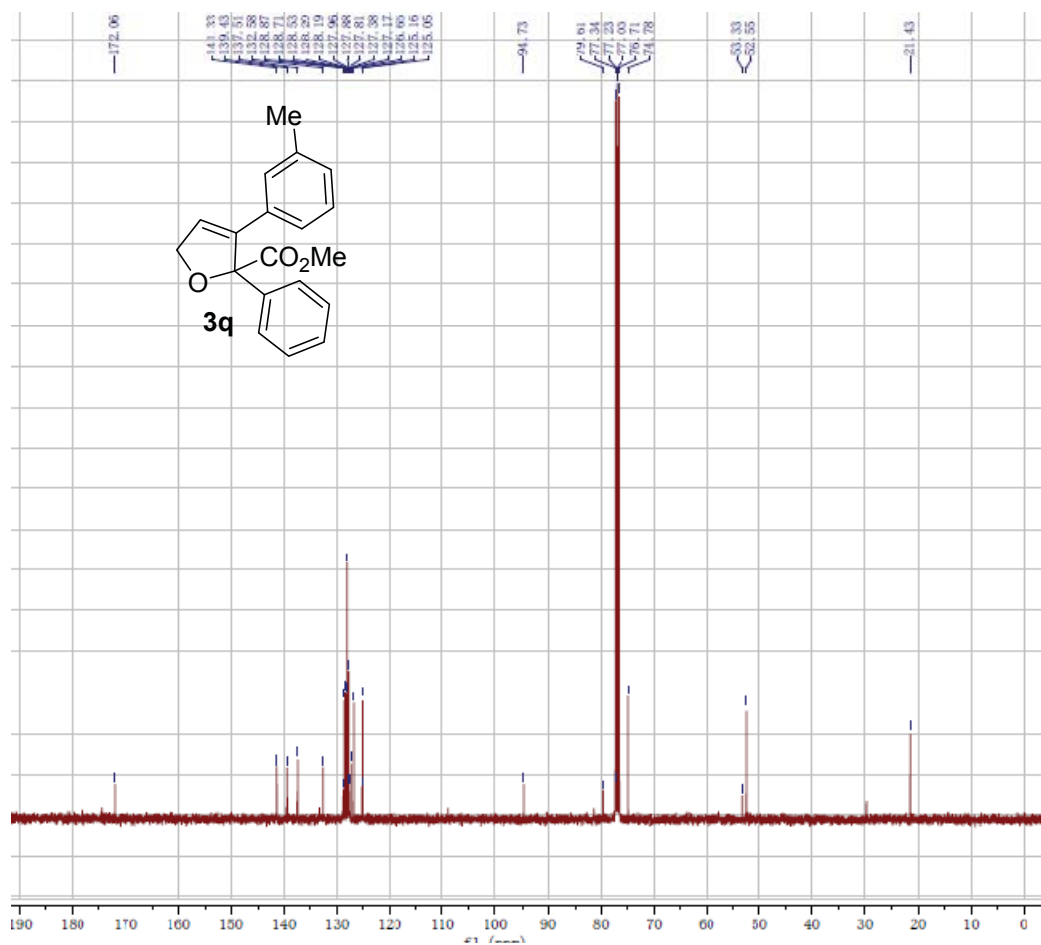

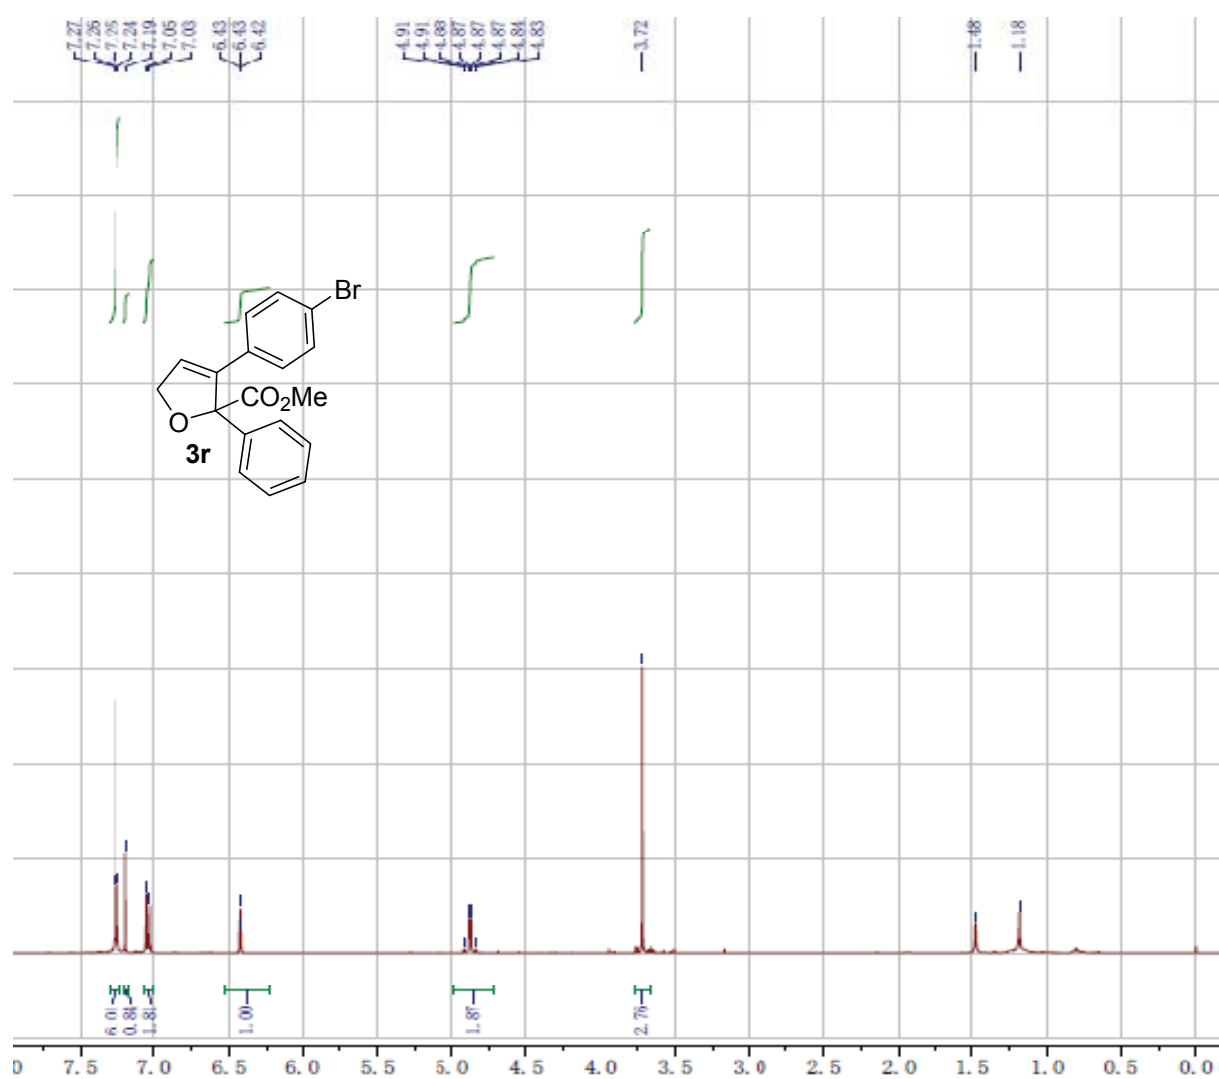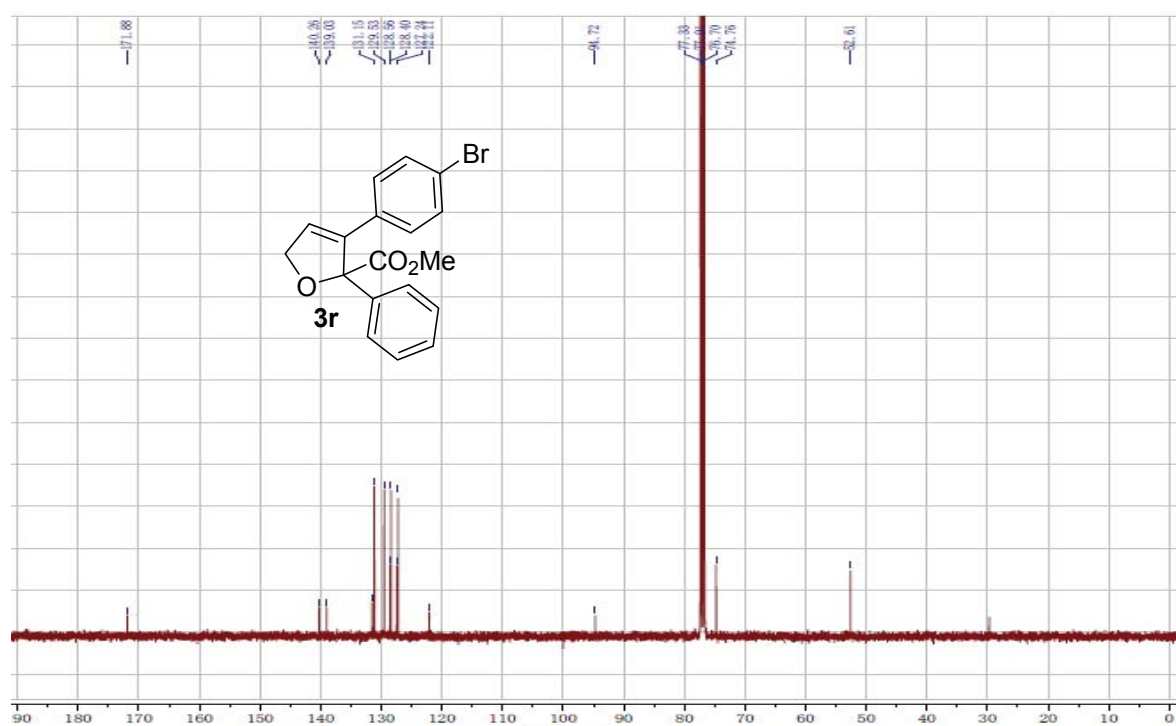

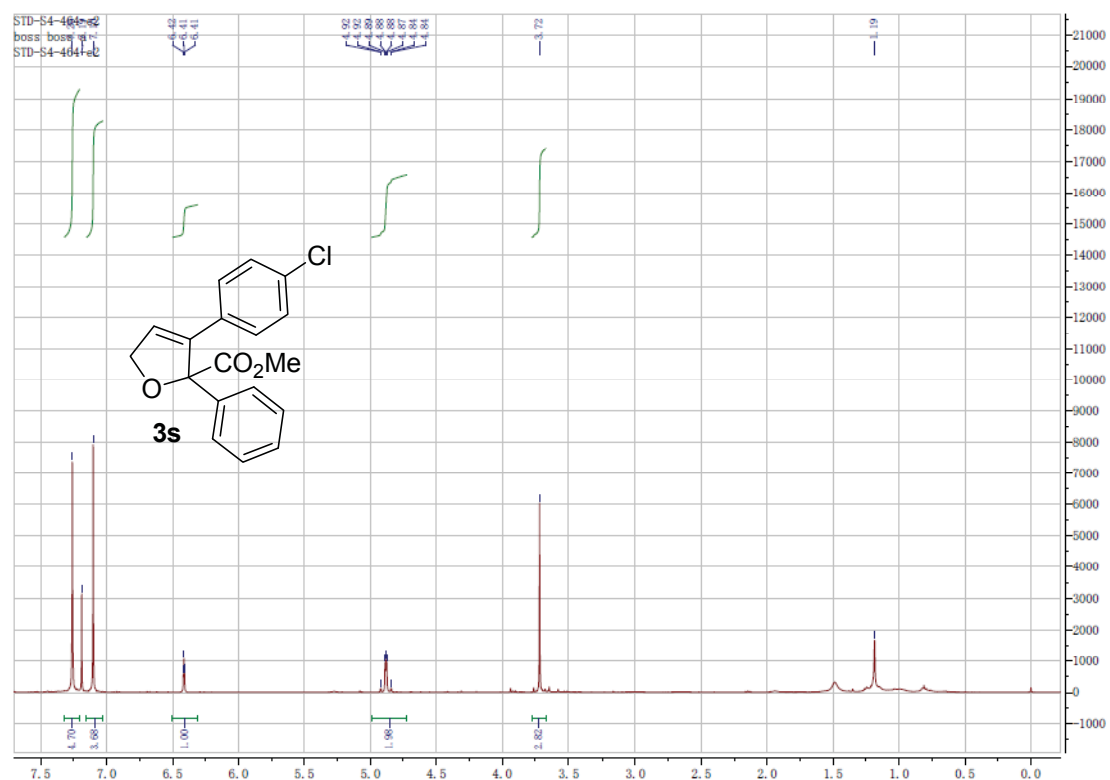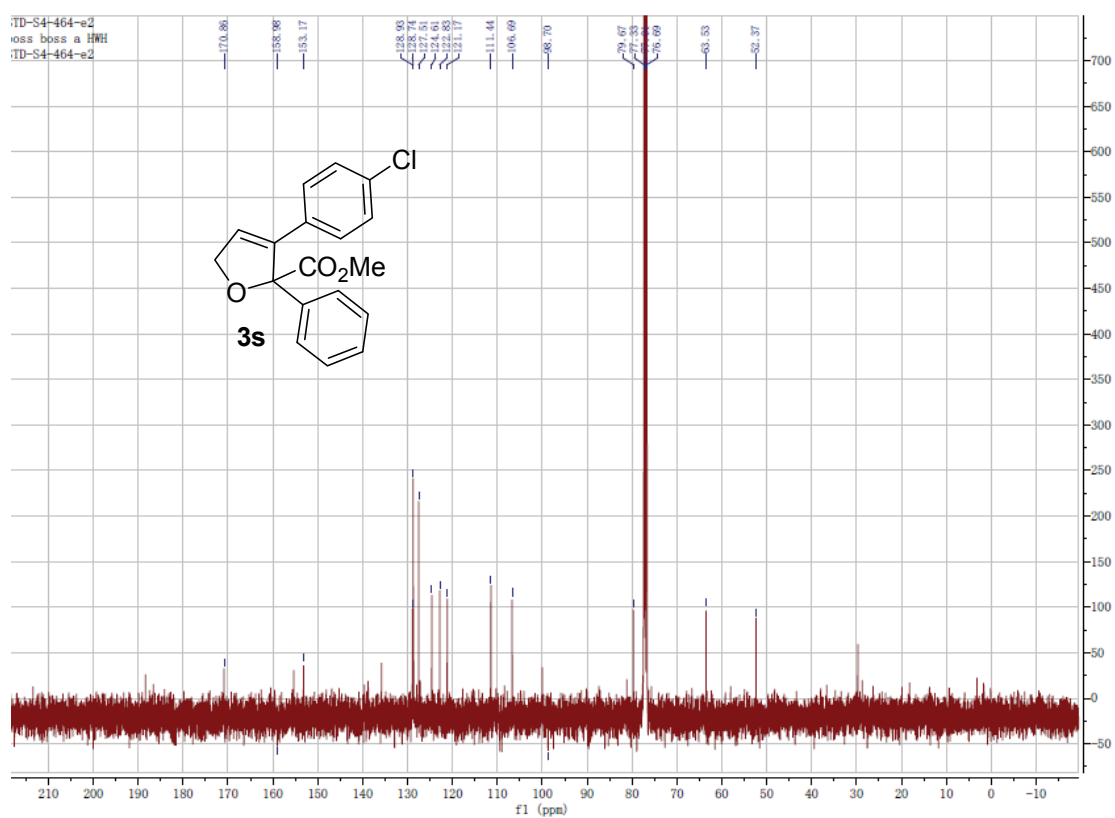

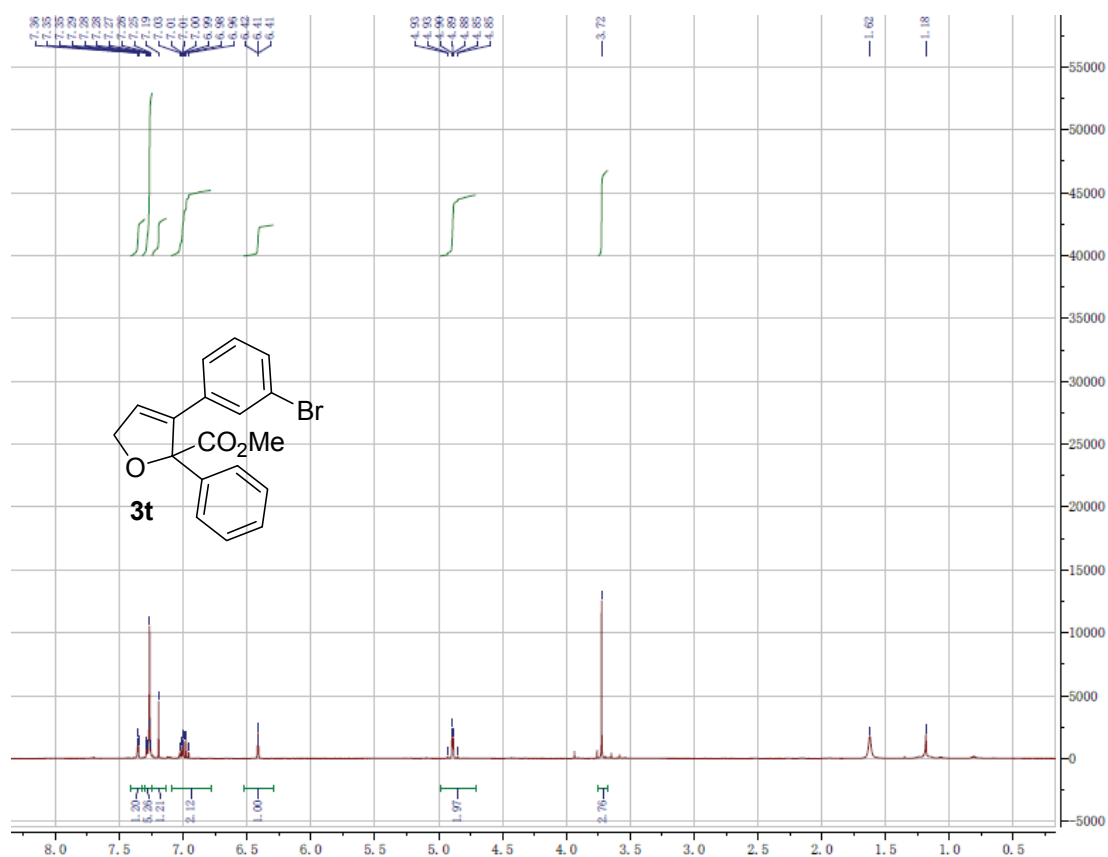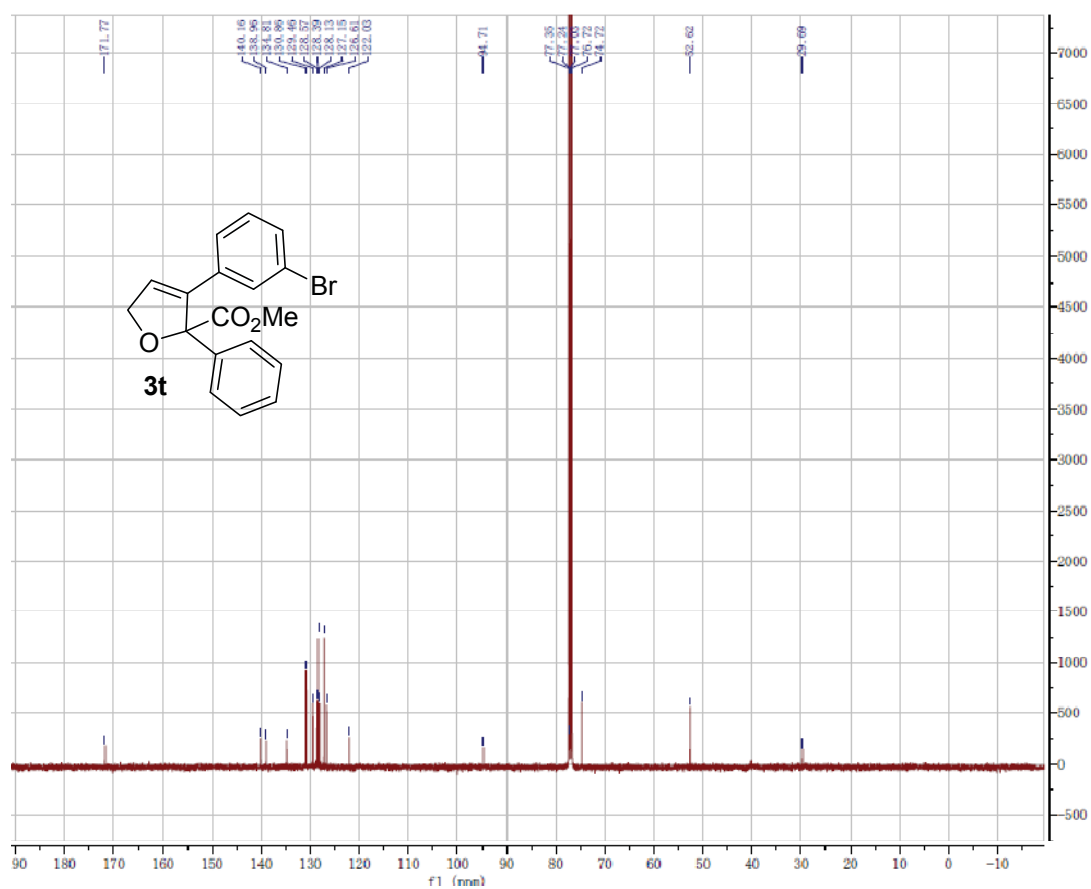

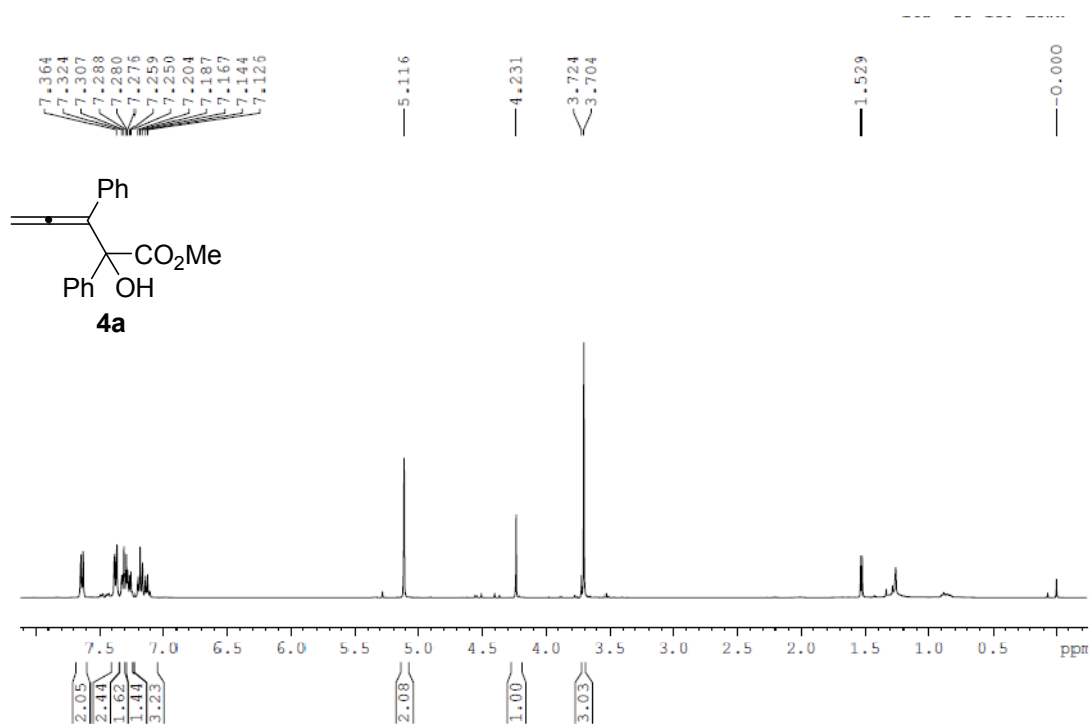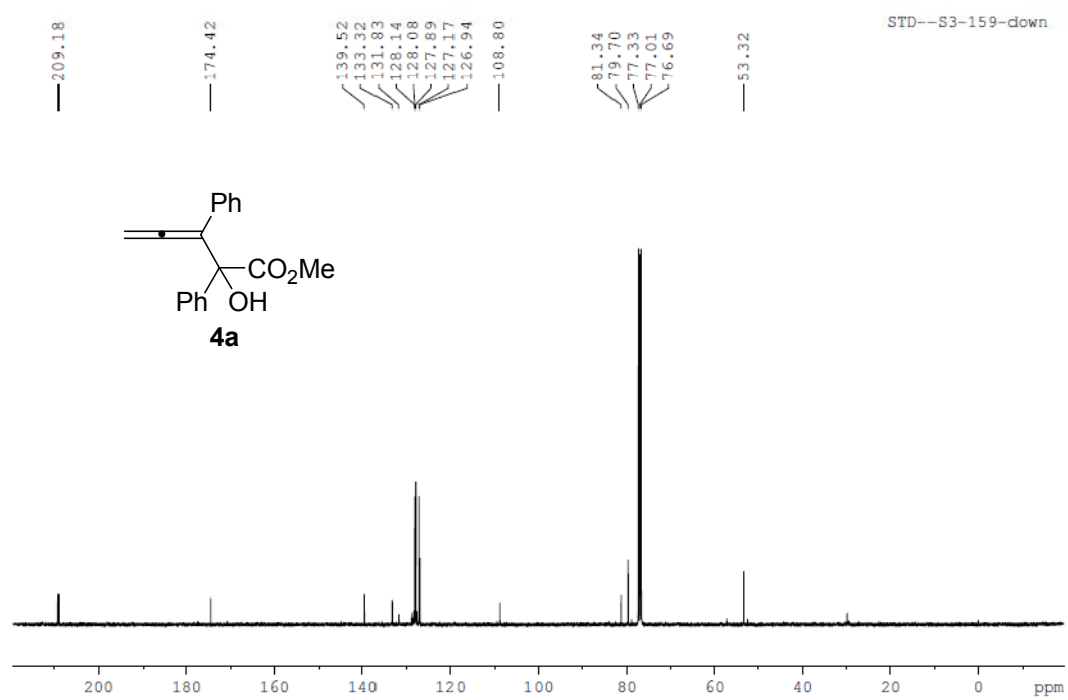



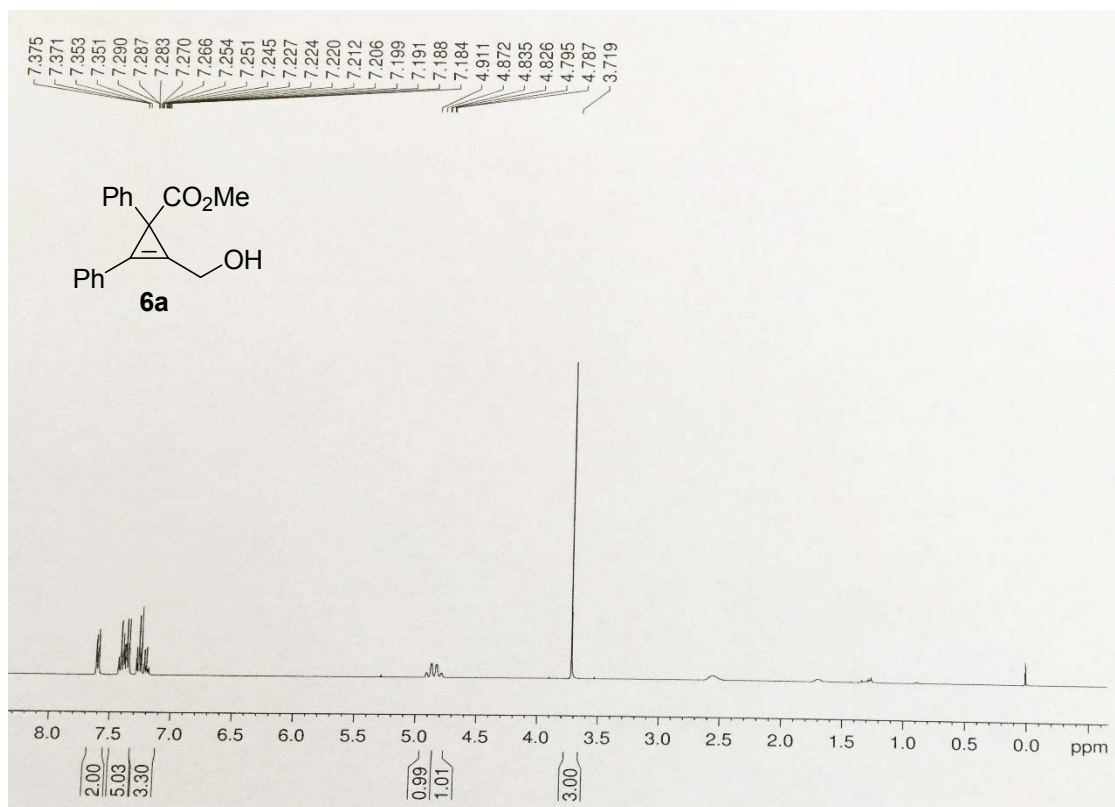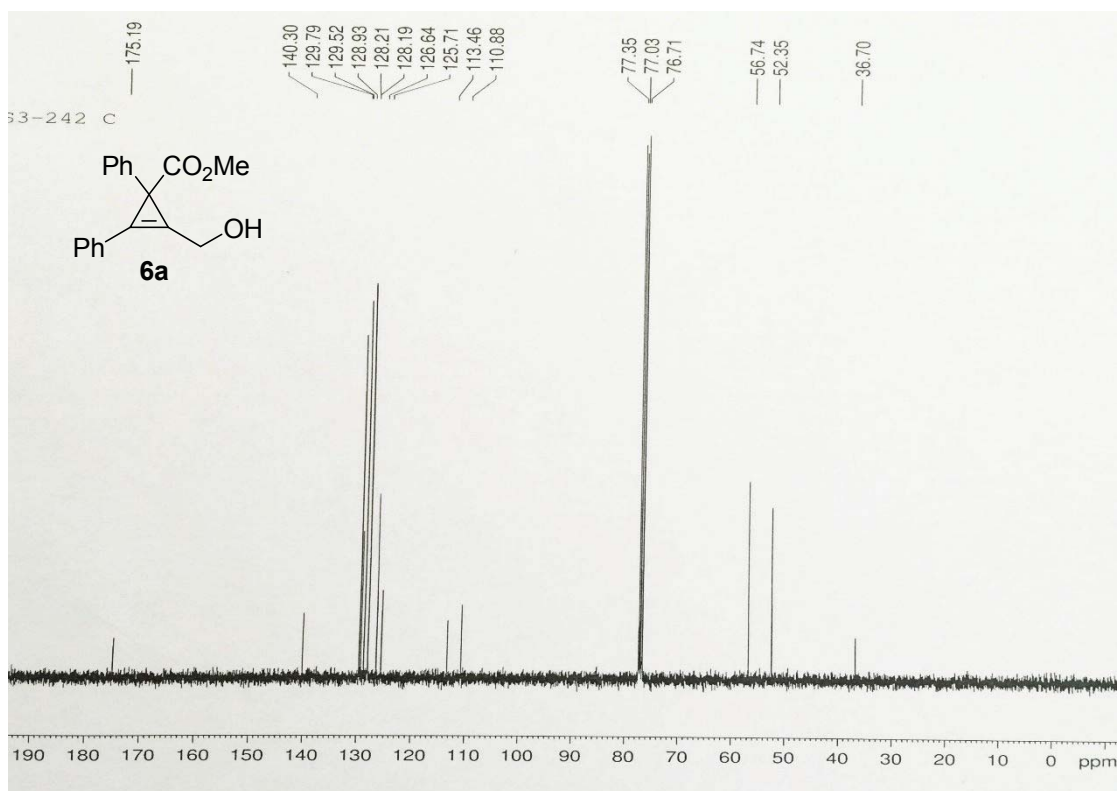

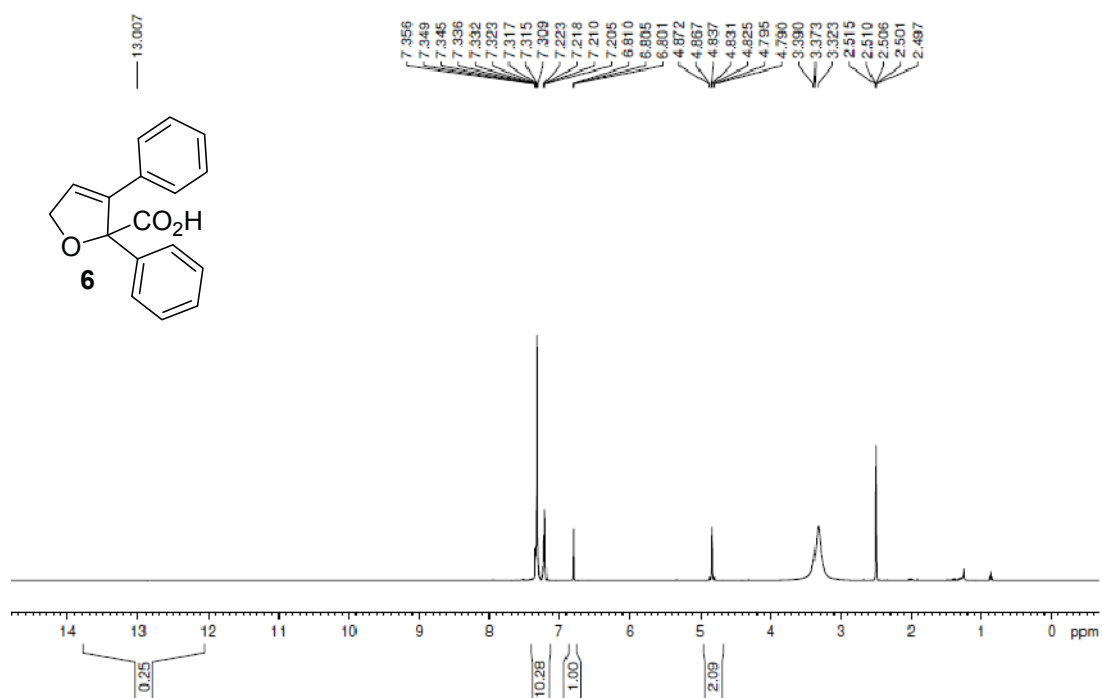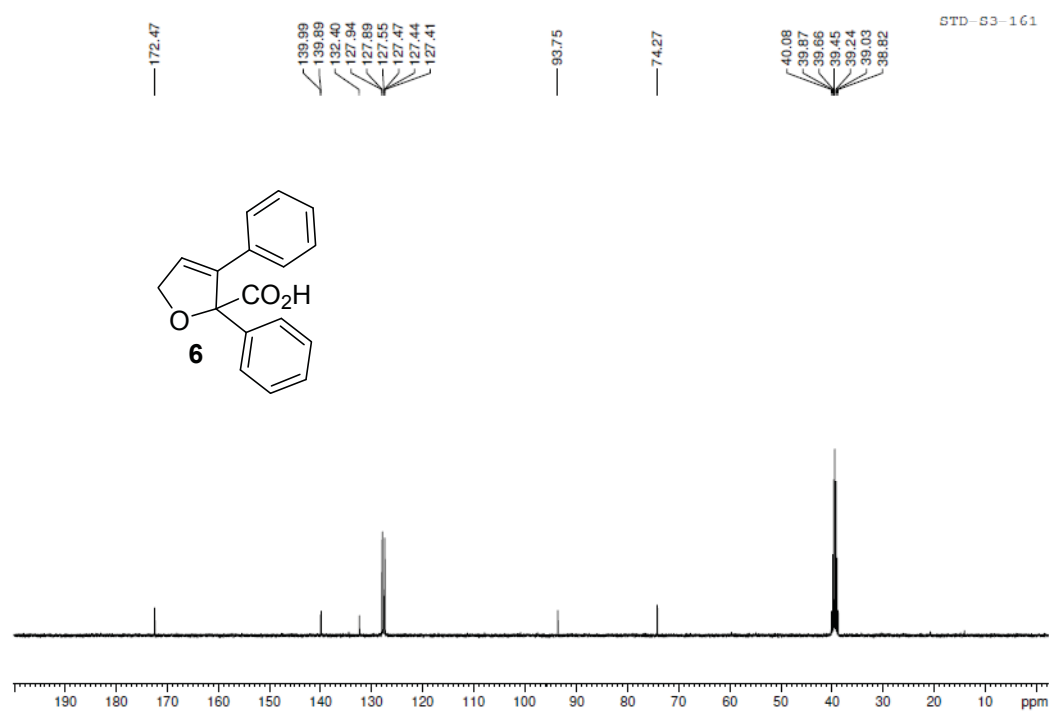

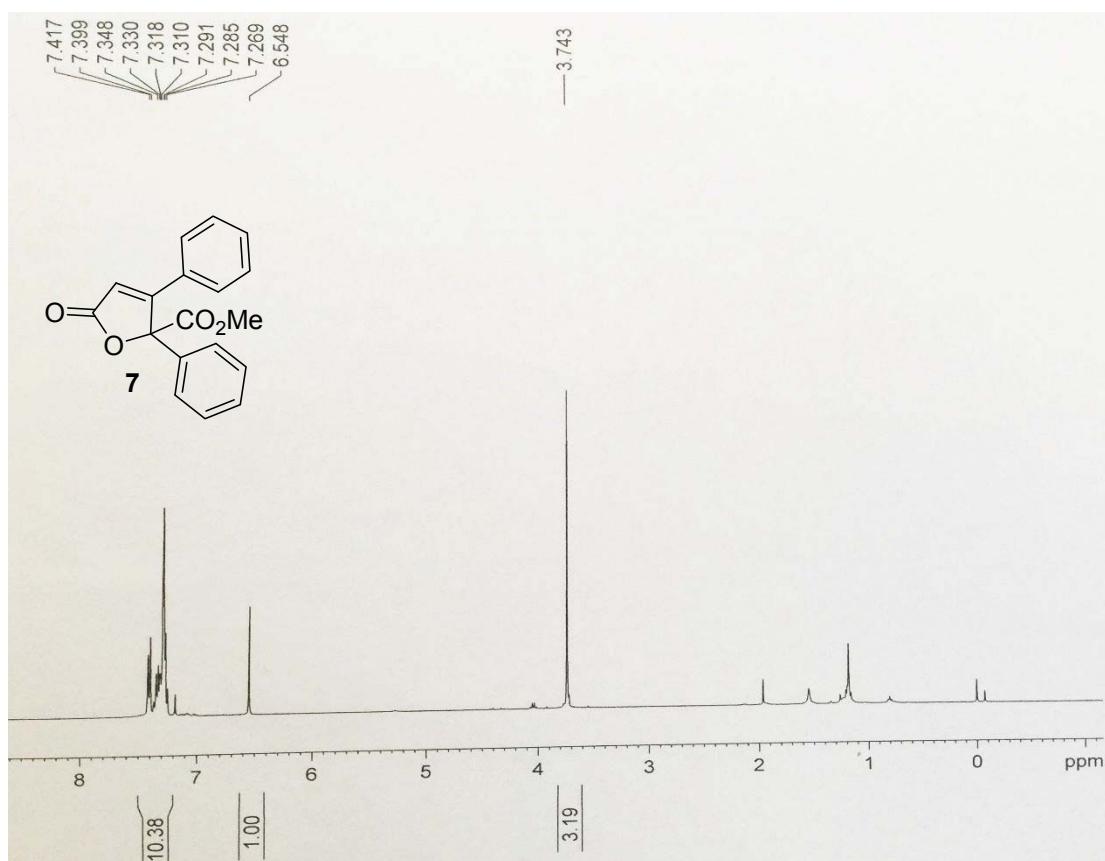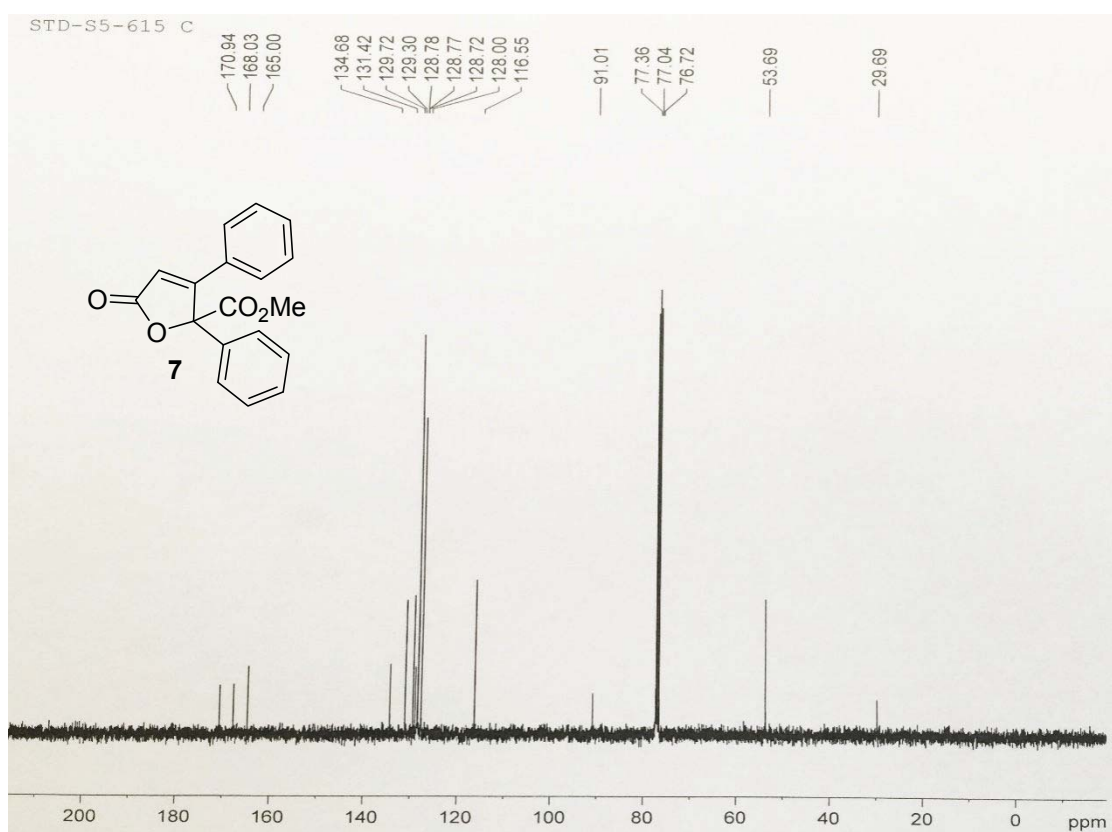

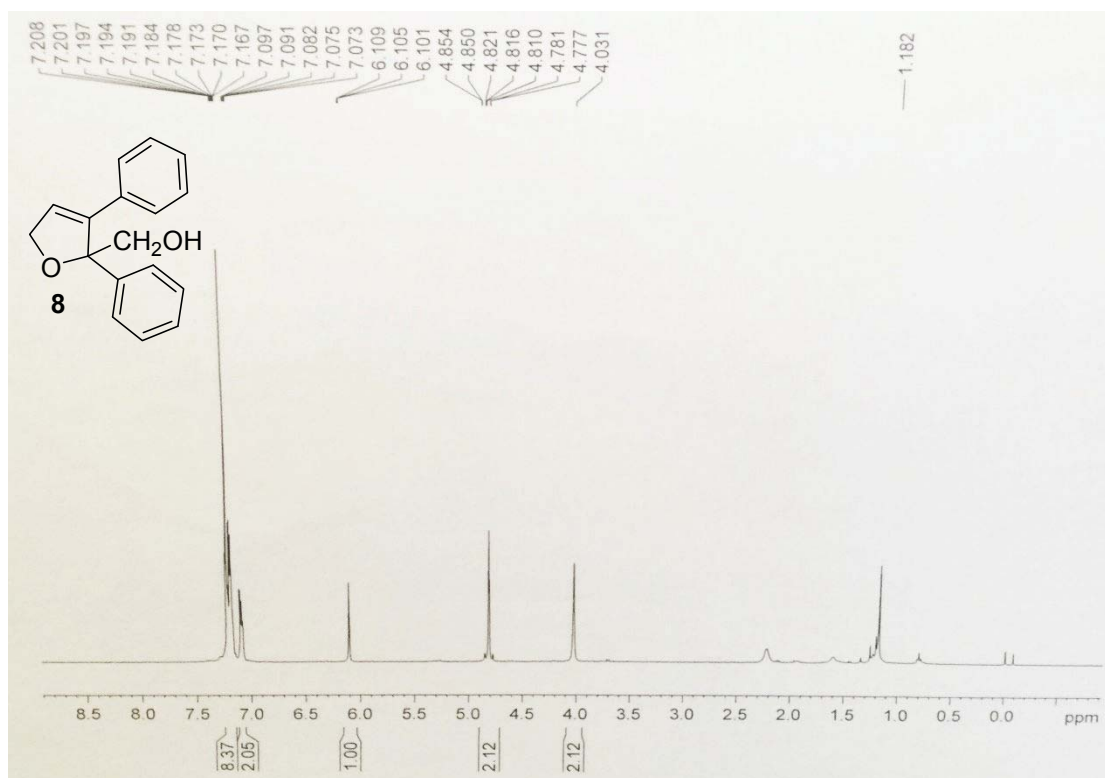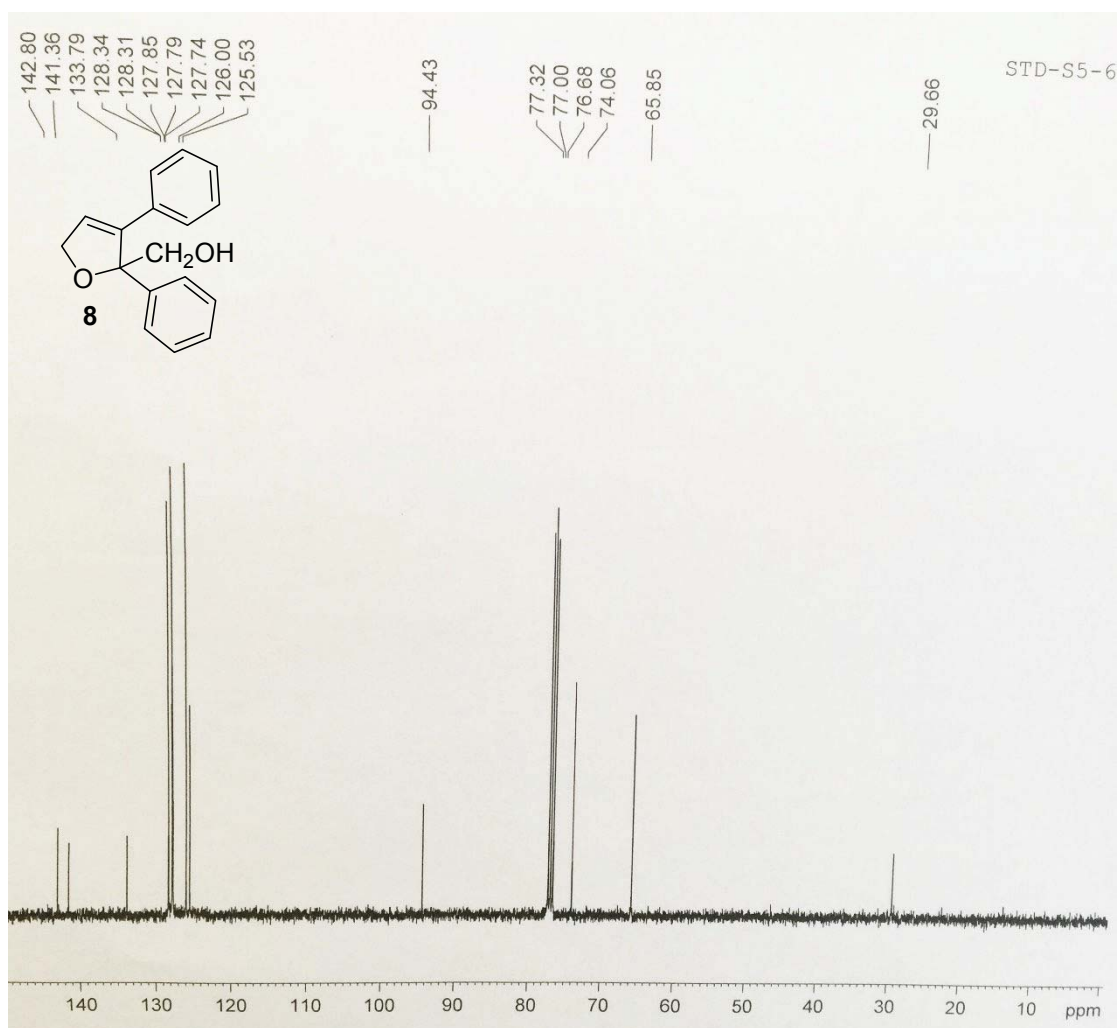

## X-ray Crystal Structure Data

CCDC 1035999 contains the supplementary crystallographic data for **8a**. These data can be obtained free of charge from The Cambridge Crystallographic Data Centre via [www.ccdc.cam.ac.uk/data\\_request/cif](http://www.ccdc.cam.ac.uk/data_request/cif).

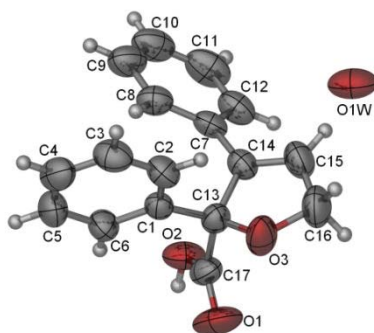

### checkCIF/PLATON report (basic structural check)

No syntax errors found.  
Please wait while processing ....

CIF dictionary  
Interpreting this report

### Datablock: z

|                                |                                                  |                        |
|--------------------------------|--------------------------------------------------|------------------------|
| Bond precision:                | C-C = 0.0036 Å                                   | Wavelength=0.71073     |
| Cell:                          | a=6.7978 (7)      b=7.3605 (7)      c=29.386 (3) |                        |
|                                | alpha=90      beta=90      gamma=90              |                        |
| Temperature: 296 K             |                                                  |                        |
| Volume                         | Calculated<br>1470.3 (3)                         | Reported<br>1470.3 (3) |
| Space group                    | P 21 21 21                                       | P2 (1)2 (1)2 (         |
| Hall group                     | P 2ac 2ab                                        | ?                      |
| Moiety formula                 | C17 H14 O3, O                                    | ?                      |
| Sum formula                    | C17 H14 O4                                       | C17 H14 O4             |
| Mr                             | 202.20                                           | 202.20                 |
| Dx, g cm-3                     | 1.275                                            | 1.275                  |
| Z                              | 4                                                | 4                      |
| Mu (mm-1)                      | 0.091                                            | 0.091                  |
| F000                           | 592.0                                            | 592.0                  |
| F000'                          | 592.33                                           |                        |
| h, k, lmax                     | 9, 9, 39                                         | 9, 9, 39               |
| Nref                           | 2212 [ 3789]                                     | 3711                   |
| Tmin, Tmax                     | 0.972, 0.980                                     | 0.966, 0.980           |
| Tmin'                          | 0.966                                            |                        |
| Correction method= MULTI SCAN  |                                                  |                        |
| Data completeness= 1.68/0.98   | Theta(max)= 28.710                               |                        |
| R(reflections)= 0.0541 ( 2749) | wR2(reflections)= 0.1607 ( 3711)                 |                        |
| S = 1.044                      | Npar= 190                                        |                        |
